1 A biodiverse package of southwest Asian grain crops facilitated high-elevation agriculture in  
2 the central Tien Shan during the mid-third millennium BCE

3

4 Giedre Motuzaitė Matuzeviciūtė<sup>1\*</sup>, Taylor R. Hermes<sup>1</sup>, Basira Mir-Makhamad<sup>1</sup>, Kubatbek  
5 Tabaldiev<sup>1</sup>

6

7 <sup>1</sup>Department of Archaeology, Vilnius University, Vilnius, Lithuania

8 \* Corresponding author

9 E-mail: [giedre.motuzaitė@gmail.com](mailto:giedre.motuzaitė@gmail.com) (Giedre Motuzaitė Matuzeviciūtė)

10

## 11 **Abstract**

12 We report the earliest and the most abundant archaeobotanical assemblage of southwest Asian  
13 grain crops from Early Bronze Age Central Asia, recovered from the Chap II site in  
14 Kyrgyzstan. The archaeobotanical remains consist of thousands of cultivated grains dating to  
15 the mid-late 3<sup>rd</sup> millennium BCE. The recovery of cereal chaff, which is rare in  
16 archaeobotanical samples from Central Asia, allows for the identification of some crops to  
17 species and indicates local cultivation at 2000 m.a.s.l., as crop first spread to the mountains of  
18 Central Asia. The site's inhabitants cultivated two types of free-threshing wheats, glume  
19 wheats, and hulled and naked barleys. Highly compact morphotypes of wheat and barley grains  
20 represent a special variety of cereals adopted to highland environments. Moreover, glume  
21 wheats recovered at Chap II represent their most eastern distribution in Central Asia so far  
22 identified. Based on the presence of weed species, we argue that the past environment of Chap  
23 II was characterized by an open mountain landscape, where animal grazing likely took place,  
24 which may have been further modified by people irrigating agricultural fields. This research  
25 suggests that early farmers in the mountains of Central Asia cultivated a high diversity of  
26 southwest Asian crops during the initial eastward dispersal of agricultural technologies, which  
27 likely played a critical role in shaping montane adaptations and dynamic interaction networks  
28 between farming societies across highland and lowland cultivation zones.

29

## 30 **Introduction**

31 Crops domesticated in various locations of Eurasia spread widely to new environments unlike  
32 those where they were initially cultivated. A number of crops originating in diverse landscapes  
33 of what is now present-day China, such as millets, hemp and buckwheat, spread to Europe,  
34 while a variety of southwestern Asian crops, such as wheat and barley, became important food

35 sources across monsoonal Asia [1–4]. In the past decade, sampling for botanical remains during  
36 archaeological excavation has become routine, and subsequent analysis has transformed our  
37 understanding of the timing and routes of plant dispersals through Central Asia [5,6]. Along  
38 these lines, one of the most important discoveries at the forefront of this fluorescence in  
39 archaeobotanical research in Central Asia was the earliest millet and wheat found together at  
40 the site of Begash in the Dzhungar Mountains of Kazakhstan dated to the end of the 3<sup>rd</sup>  
41 millennium BCE [5,6]. Further work across China showed that during the first half of the  
42 second millennium BCE, wheat and barley became fully integrated into millet cultivation  
43 systems, thus transforming agricultural strategies and culinary traditions of communities in  
44 ancient China [4,5,8–10].

45

46 Many questions still remain, however, in understanding the status of domesticated crops in  
47 diverse societies across Eurasia during the earliest stages of multidirectional agricultural  
48 dispersals [1,11–13]. We especially have a poor understanding of what species and their  
49 morphotypes were moved and why [14,15], and whether different crop species took the same  
50 pathways across wide swaths of Asia [4]. An additional enigma is represented by the earliest  
51 broomcorn millet and bread wheat from Begash that were found exclusively in a human  
52 cremation cist without crop processing chaff [7]. As this mortuary context does not inform  
53 whether these grains were consumed by people or locally cultivated, Frachetti [12] applied the  
54 term “seeds for the soul” to describe a cultural context of the seeds that was focused on ritual  
55 use. Recently, isotopic analysis employing incremental sampling of ovicaprid tooth enamel  
56 bioapatite for  $\delta^{13}\text{C}$  and  $\delta^{18}\text{O}$  values has shown that domesticated animals at Begash and the  
57 adjacent Dali site, the latter dating approximately 400 years earlier than the former, were  
58 foddered with millet during winter, suggesting that the spread of pastoralist subsistence  
59 eastward was intricately tied to the subsequent westward dispersal of millet [16]. While this

60 research sheds light on the intersection of the ritual use and economic value of millets, the  
61 cultural status of southwest Asian crops for local Central Asian societies during this period of  
62 early crop dispersals remains unclear.

63

64 Whether wheat and barley constituted a singular crop package during their dispersal remains  
65 an important line of inquiry. Current evidence suggests that barley took a different pathway  
66 than wheat to reach the present territory of China, as the radiocarbon dates measured on wheat  
67 and barley are substantially different across China, revealing that barley had spread later by  
68 people along the highland route of the Inner Asian Mountain Corridor and the southern regions  
69 of the Himalayan Mountains [4]. It has also been noted that small morphotypes of wheat were  
70 selected for cultivation as wheat moved eastward to China, since diminutive and rounder  
71 wheats may have been better suited to the culinary traditions dominated by small-grained  
72 Chinese millets [14]. On the contrary, additional research has argued that compact  
73 morphotypes of both wheat and barley recovered archaeologically in environmental margins,  
74 such as the highlands of Central Asia is strongly influenced by environmental adaptation rather  
75 than culinary preferences [15,17–19].

76

77 It is important to emphasize that our current understanding about the initial stages of the  
78 Eurasian crop interchange across Central Asia is based on an extremely small quantity of plant  
79 remains recovered from only a few archaeological sites dated to the 3<sup>rd</sup> millennium BCE, such  
80 as Begash and Tasbas in Kazakhstan, Sarazm in Tajikistan, and South Anau in Turkmenistan  
81 [20–23]. For example, at Begash (2450–2100 cal BCE), cultivated crops are represented only  
82 by 13 compact free-threshing wheat grains, one barley grain, and 61 grains of broomcorn  
83 millet, while at Tasbas (2840–2496 cal BCE) just five compact free-threshing wheat grains  
84 were found, in addition to 11 ambiguously identified “Cerealia” grains [18,23]. Such a small

85 quantity of domesticated plant grains per site does not allow us to understand cultivation  
86 strategies, the relative importance of consumption versus ritual use, or the coherence of early  
87 agricultural packages.

88

89 Here, we present an early archaeobotanical assemblage consisting of five cultivated crops of  
90 southwest Asian origin recovered from the high-elevation Chap II site located in the central  
91 Tien Shan Mountains of Kyrgyzstan. The archaeobotanical samples represent the largest crop  
92 assemblage so far found at 3<sup>rd</sup> millennium BCE sites between the Pamir, Tien Shan, and Altai  
93 Mountains, representing thousands of carbonized cereal remains. The assemblage reflects a  
94 strikingly high degree of biodiversity in wheat and barley grain morphotypes. Analysis of the  
95 accompanying weed taxa recovered from Chap II hints on the past ecology of cereal cultivation,  
96 suggesting that crops may have been grown with the aid of irrigation, while recovered chaff  
97 fragments indicate local cultivation and processing. Notably, we present chaff and grain  
98 remains of glume wheat that, for the first time, were recovered from the eastern regions of  
99 Central Asia.

100

## 101 **The Chap II site**

102 The Chap II site is located in the Kochkor valley of central Kyrgyzstan at 2000 m.a.s.l.  
103 (42°10'51.7" N, 75°51'3.64" E). The site is situated inside the inundation of a small loess hill  
104 that protrudes from the foothills into the southeastern part of the 80-km long Kochkor valley  
105 (Fig 1). The archaeological remains of Chap II were recovered through excavation of the Chap  
106 I farmstead (1065-825 cal BCE), which was occupied during the transitional period from the  
107 Late Bronze Age to the Early Iron Age [24]. In previous years, a small 6.5x6.5 m trench was  
108 excavated that yielded a diverse assemblage of ceramic sherds, crop processing tools, domestic

109 animal skeletal remains, carbonized remains of domesticated grains and chaff, which together  
110 reflect extensive agricultural and pastoralist activities by the inhabitants of the Chap I site [24].

111

112 **Fig 1.** The bird's eye view (a) and the perspective view (b) (courtesy of Google Earth) (b) of  
113 the Kochkor valley facing west, with location of the Chap site shown situated near the village  
114 of Karasu and Kochkor city. (c) The Chap site in relation to other archaeobotanically  
115 analyzed sites in Kyrgyzstan.

116

117 The Chap II site is located stratigraphically below the occupational layers of Chap I and was  
118 excavated in the summer of 2019. Chap II is separated from the final occupational strata of  
119 Chap I by a *ca* 1-m thick loess deposit. The archaeological horizon of Chap II consists of two  
120 ash pits (referred as pit 1 and pit 2), containing burned animal bones, one small fragment of  
121 pottery, and abundant carbonized plant remains. The pits are separated from one another by a  
122 sterile, 10-cm thick horizon; pit 1 is stratigraphically above pit 2, likely reflecting different  
123 formation events. The bottom portion of pit 2 reaches a depth of 260 cm above the modern  
124 surface and cradles a large, in-situ boulder. The deposition of pit 1 and 2 most likely were the  
125 result of discarded domestic waste, since the pits were not associated with discernable features  
126 that could be interpreted as being used for mortuary purposes or other commemorative  
127 practices.

128

## 129 **Methods**

### 130 **Archaeobotanical analysis**

131 We followed the British Heritage strategy of macrobotanical sampling by collecting at least 40  
132 L of sediment from two different areas of each archaeological context. This sediment volume

133 produces a more comprehensive diversity of plant taxa in archaeological deposits than that  
134 yielded from sample volumes of 10 L, which in turn, better reflects human subsistence  
135 activities [25]. Bucket flotation using a 0.3 mm screen was used to float sediment samples. In  
136 total, 136 L of sediment from the two discernible ash pits were floated: 40 L from pit 1 and 96  
137 L from pit 2. The flotation samples were analyzed archaeobotanically at the Bioarchaeology  
138 Research Centre of Vilnius University, where they are currently archived. The  
139 stereomicroscope and the reference collection of Bioarchaeology Research Centre, including  
140 botanical seed atlases, were used to identify and quantify plant remains [26,27]. No permits  
141 were required for the described study, which complied with all relevant regulations.

142

## 143 **Radiocarbon dating**

144 Radiocarbon dating of carbonized grains by accelerator mass spectrometer (AMS)  $^{14}\text{C}$  dating  
145 was performed at the 14CHRONO Centre for Climate, the Environment, and Chronology,  
146 Queen's University Belfast. Three cereal caryopses collected from flotation samples were  
147 selected for direct dating: two wheat grains from pit 1 and one barley grain from pit 2.  
148 Radiocarbon determinations were calibrated using IntCal13 calibration curve [28], which were  
149 modelled in OxCal v. 4.3 [29] according to their stratigraphic positions relative to previously  
150 identified occupational layers yielding  $^{14}\text{C}$  dates of domesticated grains recovered from Chap  
151 I previously reported by Motuzaite Matuzeviciute et al. [24].

152

## 153 **Results**

### 154 **Cultivated plants**

155 The archaeobotanical assemblages of pits 1 and 2 are dominated by grains and chaff of free-  
156 threshing and glume wheats and also barleys of naked and hulled varieties. In total, 661 free-

157 threshing wheat caryopses (*Triticum aestivum/durum*), including whole and slightly  
158 fragmented grains, were recovered. The free-threshing wheat grains have highly compact  
159 morphotypes with strikingly large variation in grain size, ranging from 6 to 2.4 mm in length,  
160 4.2 to 1.8 mm in breadth, and 3.4 to 1.2 mm in depth. The majority of wheat grains probably  
161 belong to two free-threshing species of *T. durum* and *T. aestivum* (Fig 2). The grains of those  
162 species were counted together, yet the presence of rachis internodes belonging to bread wheat  
163 and durum wheat shows that the assemblage contains both species (Table 1) (Fig 3a, b).

164

165 **Fig 2.** The compact wheat varieties from the Chap II site. The images of wheat show large size  
166 variation.

167

168 Sixteen grains of glume wheat, probably representing emmer wheat (*T. dicoccum*), were  
169 distinct from the free-threshing wheat grains, based on the grains having narrower widths as  
170 compared to free-threshing wheat and also exhibiting shallow, elongated and blunted apices  
171 and embryo notches, higher dorsal ridges (keel) and slight deflections on the ventral side (Fig  
172 3d). The recovery of one fragment of a glume base clearly shows the presence of glume wheat  
173 in the archaeobotanical assemblage of Chap II (Fig 3c).

174

175 **Fig 3.** Rachis internodes of free-threshing hexaploid wheat (*Triticum cf. durum*) (a), *Triticum*  
176 *cf. aestivum* (b); Glume base and grains of glume wheat (*Triticum cf. dicoccum*) (c, d).

177

178 The majority of recovered barleys belong to highly compacted varieties of *Hordeum vulgare*  
179 *var. nudum.*, totaling 257 grains. As observed in wheat, the naked barley grains also vary  
180 widely in size and shape, ranging from 6.4 to 2.7 mm in length, 4.3 to 1.8 mm in breadth, and  
181 3.5 to 1.2 mm in depth (Fig 4). Surprisingly, the measurements of barley are similar to the



182 measurements of wheat. In fact, some of the barley grains were so strongly compacted, that  
183 differentiating them from wheat was only possible from the lateral view (Fig 4). Three barley  
184 grains were identified to hulled barley varieties. At Chap II, most barley remains are  
185 represented by symmetrical grains, probably belonging to two- or four-row varieties. Counting  
186 partial and whole grains together, both pits yielded 482 grains of barley. Due to fragmentation,  
187 2040 grain remains were identified as “Cerealia” type.

188

189 **Fig 4.** Highly compact morphotypes of naked barley from Chap II.

190

191 It was surprising that no remains of East Asian crops were recovered from the flotation  
192 samples, such as broomcorn or foxtails millet, which were present at Chap I [24]. Interestingly,  
193 34 carbonized food fragments, up to 9.5 mm in size, were also identified. These remains were  
194 characterized by porous or amorphous-like matrices and a burned, lumpy conglomerate, some  
195 containing cereal bran fragments. These charred food pieces probably represent the remains of  
196 bread or porridge. The food fragments were not analyzed in this study but will be the subject  
197 of future research.

198

## 199 **Wild plants**

200 The most common seed remains in the wild plant assemblage were from *Chenopodium* sp.  
201 (goosefoot), represented by 760 carbonized grains (Table 1). *Chenopodium* plants normally  
202 represent ruder weeds that grow in nitrogen-rich, former domestic spaces [30,31]. The second  
203 most abundant wild seeds were from *Carex* sp. (sedges), totaling 658 carbonized grains (Table  
204 1). Five morphotypes of *Carex* caryopses were identified, which likely all belong to different  
205 species (Fig 5). Most *Carex* plants grow in wetland ecosystems and tolerate saline waters [32].  
206 The presence of sedge seeds among the domesticated grains at Chap II could mean that crops

207 were grown in close proximity to sedges, possibly along irrigated channels or mountain  
 208 streams. The other wild species are represented by smaller seed counts. The majority of them  
 209 reflect open meadow, arable and possibly irrigated landscapes, such as *Salsola kali*, *Polygonum*  
 210 sp. or *Galium* sp. (Table 1). Moreover, the majority of taxa are not found in the undergrowth  
 211 of forests [33,34], which helps illustrate a local environment surrounding Chap II that was  
 212 devoid of trees.

213

214 **Fig 5.** The five types of *Carex* sp. (sedges) found at Chap II.

215

216 **Table 1.** Archaeobotanical identifications from Chap II.

217

|              |                      | Context                                                            | Pit 1 | Pit 2 | Total |
|--------------|----------------------|--------------------------------------------------------------------|-------|-------|-------|
|              | Family               | Taxa                                                               |       |       |       |
| Domesticated | Poaceae              | <i>Triticum aestivum/durum</i>                                     | 118   | 204   | 322   |
|              |                      | <i>Triticum aestivum/durum</i><br>(fragments)                      | 81    | 258   | 339   |
|              |                      | <i>Triticum aestivum</i> and <i>T. durum</i><br>(rachis internode) |       | 2     | 2     |
|              |                      | <i>Triticum</i> cf. <i>dicoccum</i>                                | 5     | 11    | 16    |
|              |                      | <i>Triticum</i> cf. <i>dicoccum</i><br>(rachis internodes)         |       | 1     | 1     |
|              |                      | <i>Hordeum vulgare</i> (naked)                                     | 125   | 132   | 257   |
|              |                      | <i>Hordeum vulgare</i> (hulled)                                    | 2     | 1     | 3     |
|              |                      | <i>Hordeum</i> sp. (fragments)                                     | 106   | 116   | 222   |
|              |                      | <i>Cerealia</i> (fragments)                                        | 688   | 1361  | 2049  |
| Wild         | Amaranthaceae        | <i>Chenopodium</i> sp.                                             | 280   | 480   | 760   |
|              |                      | <i>Amaranthus</i> sp.                                              | 4     | 2     | 6     |
|              |                      | <i>Salsola kali</i>                                                | 12    | 18    | 29    |
|              | Caryophyllaceae      | <i>Cerastium</i> sp.                                               |       | 2     | 2     |
|              |                      | <i>Vaccaria</i> sp.                                                |       | 2     | 1     |
|              | Cyperaceae           | <i>Carex</i> sp. (five types)                                      | 209   | 449   | 658   |
|              | Fabaceae             | <i>Pisum/Vicia</i> sp.                                             |       | 1     | 1     |
|              |                      | <i>Trifolium/Melilotus</i> sp.                                     | 2     | 5     | 7     |
|              |                      | <i>Medicago/Trifolium</i> sp.                                      |       | 6     | 6     |
|              |                      | <i>Hippocrepis comosa</i>                                          |       | 1     | 1     |
|              | Poaceae              | <i>Agrostis</i> sp.                                                | 1     |       | 1     |
|              |                      | <i>Stipa</i> type                                                  |       | 2     | 2     |
|              |                      | <i>Bromus</i> sp.                                                  | 5     | 1     | 6     |
| Poaceae      |                      |                                                                    | 1     | 1     |       |
| Polygonaceae | <i>Polygonum</i> sp. |                                                                    | 5     | 5     |       |

|  |               |                       |    |    |    |
|--|---------------|-----------------------|----|----|----|
|  | Ranunculaceae | <i>Ranunculus</i> sp. |    | 2  | 1  |
|  | Rosaceae      | <i>Potentilla</i> sp. |    | 1  | 1  |
|  | Rubiaceae     | <i>Galium</i> sp.     | 14 | 24 | 38 |
|  | Lamiaceae     | <i>Thymus</i> sp.     |    | 1  | 1  |
|  |               | Bread/food remains    | 9  | 25 | 34 |

218

## 219 Radiocarbon dating

220 Three radiocarbon determinations were measured on two individual wheat grains from pit 1  
 221 and one individual barley grain from pit 2. Showing consistency with the relative stratigraphic  
 222 position of pit 2 below pit 1, the modelled date of the barley grain from pit 2 is 2467-2292 cal  
 223 BCE, while the wheat grains from pit 1 together provide a modelled date of 2402-2047 cal  
 224 BCE (Table 2; Fig 6). Overall, the two pits date to nearly 1500 years before the occupation of  
 225 Chap I, raising the possibility that the site was abandoned for a considerable amount of time  
 226 during the second millennium BCE (Fig 6).

227

228 **Fig 6.** The images of directly radiocarbon dated naked barley from pit 2 (top) and free-threshing  
 229 wheat grains (middle and bottom) from pit 1 with listed calibrated dates from Chap II site.

230

231 **Table 2.** AMS radiocarbon dates measured on macrobotanical remains recovered from Chap  
 232 II. Previously published radiocarbon dates taken on domesticated grains from Begash [7] and  
 233 Tasbas [23] are also shown to help contextualize the chronology of Chap II.

| Site                | Dated material           | Context     | Lab number  | <sup>14</sup> C age BP | ±  | Calibrated age (cal. BCE 95.4% range) | Modelled age (cal BCE 95.4% range) | Modelled mean age (cal BCE) |
|---------------------|--------------------------|-------------|-------------|------------------------|----|---------------------------------------|------------------------------------|-----------------------------|
| Chap II             | Wheat                    | Pit 1       | UBA-41509   | 3754                   | 33 | 2284-2038                             | 2294-2047                          | 2195                        |
| Chap II             | Wheat                    | Pit 1       | UBA-41508   | 3857                   | 31 | 2462-2284                             | 2402-2204                          | 2299                        |
| Chap II             | Barley                   | Pit 2       | UBA-41507   | 3899                   | 30 | 2469-2297                             | 2467-2292                          | 2371                        |
| Begash <sup>1</sup> | Wheat & broomcorn millet | Burial cist | Beta-266458 | 3840                   | 40 | 2460-2150                             | -                                  | -                           |
| Tasbas <sup>2</sup> | Wheat                    | Burial cist | Beta-391200 | 4010                   | 30 | 2617-2468                             | -                                  | -                           |

234

235 **Fig 7.** Modelled radiocarbon dates measured on wheat barley grains from Chap II in relation  
236 to the occupational period of Chap I previously reported by Motuzaite Matuzeviciute et al.  
237 [24].

238

## 239 **Discussion**

240 Dated to the middle to second half of the 3<sup>rd</sup> millennium cal BCE, the archaeobotanical  
241 assemblage of Chap II represents the earliest and the most abundant assemblage of cereal and  
242 wild plant macrobotanical remains in eastern Central Asia and is further notable for its recovery  
243 at 2000 m.a.s.l. Contrary to previous suggestions that an initial eastward dispersals of wheat  
244 and barley may have diverged from one another upon reaching the Inner Asian Mountain  
245 Corridor [4], the early co-occurrence of both wheat and barley in similar proportions at Chap  
246 II suggests that these crops spread into the highlands of Central Asia as a package. This scenario  
247 indicates that people engaging in plant cultivation in the Tien Shan were equally invested in  
248 varieties of wheat and barley that already had been adapted to high elevations, where short  
249 growing seasons and low temperatures impose considerable difficulties for farmers. The  
250 biodiversity of crops, reflected in both the compact grain morphotypes, large variation in cereal  
251 grain sizes, and relative abundance of taxa, present at Chap II illustrates subsistence strategies  
252 that likely favored agricultural resilience by safeguarding crop production from extreme and  
253 uncertain weather conditions characteristic of montane environments. However, it is notable  
254 that the archaeobotanical assemblage of Chap II lacks Chinese domesticates of millet, which  
255 provide agriculturalists with additional flexibility in production on account of millets having  
256 short growing seasons and drought tolerance. The fact that broomcorn millet was recovered at  
257 Begash located at 900 m.a.s.l. [7] and likely cultivated there and at Dali located at 1500 m.a.s.l.  
258 [16], both in the neighboring region of Semirech'ye (southeastern Kazakhstan), had previously

259 implied that millet may have also reached the central Tien Shan by the end of the third  
260 millennium BCE. The definitive absence of millet at Chap II may indicate that 1) interaction  
261 networks reaching into the northern stretches of the Inner Asian Mountain Corridor did not  
262 connect people living in the central Tien Shan or 2) an elevational ceiling for successful  
263 cultivation below 2000 m.a.s.l. existed for millet cultigens in the third millennium BCE. During  
264 the occupation of Chap I 1500 years later, millets formed an important component of the local  
265 crop repertoire, potentially overcoming prior environmental constraints [35].

266

267 The archaeobotanical assemblage at Chap II site is dominated by domesticates of southwest  
268 Asian origin: free-threshing wheats (possibly *T. durum* and *T. aestivum*) and both naked and  
269 hulled barleys. The free-threshing wheat grains correspond to compact wheat forms noted in  
270 the Dzhungar Mountains of Semirech'ye [6,18,19]. Furthermore, archaeobotanical research in  
271 Kyrgyzstan identified compact wheat forms at the sites of Uch Kurbu, Aigyrzhal-2, and Mol  
272 Bulak located in the highland regions (Fig 1c) [15,17], which suggests that compact wheat  
273 morphotypes are adapted to high elevations. Other researchers have also noted the suitability  
274 of compact wheats for agriculturalists in marginal environments of south and east Asia, such  
275 as monsoonal areas of India and the highlands of the Tibetan plateau [14,36]. It has been argued  
276 that, compared to non-compact forms, compact varieties of wheat exhibit greater standing  
277 power against extreme weather conditions, such as strong winds and intense rains that can  
278 cause lodging and stem breakage [15]. In addition to compact forms, large variation in wheat  
279 grain size was also noted for the wheats at Chap II, ranging from 6.0 to 2.4 mm in length, 4.2  
280 to 1.8 mm in breadth and 3.4 to 1.2 mm in depth. This wide variation in grain size may be the  
281 result of environmental factors that crop plants were exposed to during grain development.  
282 Previous experimental research has shown that plants experiencing physiological stress from  
283 differences in water availability, ambient temperature, or amount of nutrients during grain

284 filling resulted in grain size diminution, due to interference in the deposition of carbohydrates  
285 in the grains [37–42]. In addition, Reed [43] also showed that grains from a single ear of spelt  
286 wheat exhibited a wide variety of sizes, indicating that variability in grain size can also be due  
287 to heterogeneous ripening times of grains on the ear.

288

289 It is noteworthy to point out that the biometrical data for wheat grains recovered from Bronze  
290 and Iron Age sites in Kyrgyzstan substantially overlap with that of wheat grains from second  
291 millennium BCE sites in north western China [14,15]. In eastern regions of monsoonal China,  
292 however, ancient wheat grains show dramatically smaller sizes and follow a more uniform size  
293 distribution, which suggest that the eastward spread of wheat was associated with an overall  
294 convergence to diminutive grains [14]. Further research is needed in order to understand  
295 whether the reduction in wheat grain size in monsoonal China was influenced by climate,  
296 human choice, or the geographical origins of particular wheat morphotypes.

297

298 The presence of two types of free-threshing wheat rachis internodes (Fig 3) and the large  
299 diversity of wheat grain morphotypes found at Chap II and at other sites in Kyrgyzstan, such  
300 as Argyrzhal-2 and Uch-Kurбу [17], suggest that probably both tetraploid and hexaploid free-  
301 threshing wheat were cultivated. In China, archaeobotanical research mainly reports grain  
302 morphology, thus offering opportunities for future analysis of rachis internodes to test whether  
303 both tetraploid and hexaploid free-threshing wheats were cultivated there and, possibly, to  
304 resolve the timing and dispersal routes of these species.

305

306 The discovery of glume wheat at Chap II site during early phases of southwest Asian crop  
307 dispersals to the central Tien Shan is also important for understanding the limits of its eastward  
308 spread. Current evidence suggests that the cultivation of glume wheat did not reach the present-

309 day territory of China at the initial stage of southwestern crop dispersal during the third-second  
310 millennia BCE. The free-threshing wheats were selected instead of glume wheats as they  
311 dispersed eastwards from centers of domestication in southwest Asia [44]. Most ancient  
312 Chinese wheat remains are hexaploid free-threshing *Triticum aestivum* [45–47], in contrast to  
313 the types of wheat recovered from Neolithic and Bronze Age sites in southwestern Asia, where  
314 agriculture was mainly based on glume wheat [44].

315

316 A review by Stevens et al. [44] reported modern glume wheat varieties (*T. aestivum* var.  
317 *tibetianum* JZ Shao) in western China with limited distribution in Yunnan, Tibet, and Xinjiang,  
318 in addition to a glume wheat variety in Yunnan (*Triticum aestivum* subsp. *yunnanense* King ex  
319 SL Chen). Notably, the rachis internode of the glume wheat recovered from Chap II does not  
320 resemble that of typical glume wheat belonging to *T. dicoccum* found in Europe. Comparing  
321 the glume wheat internode bases from Chap II with those previously reported at the  
322 *Linearbandkeramik* site of Ratniv-2 site located in western Ukraine [48], the curve between  
323 glume and glume base at Chap II is straighter and *ca* 25% larger. Therefore, glume wheat at  
324 Chap II could represent local Central Asian variety or be related to modern Chinese varieties  
325 mentioned above. A few grains of glume wheats (but no chaff) have also been recently reported  
326 from Kanispur site in Kashmir, dating by associated charcoals to a similar period as Chap II in  
327 the third millennium BCE [49]. Further research is needed to understand why glume wheats  
328 were used but later disappeared from the package of cultivars among mountain communities  
329 of eastern Central Asia.

330

331 The archaeobotanical assemblage of Chap II is dominated by naked varieties of barley, which  
332 became commonly cultivated across the Tibetan plateau [36,50]. The reason for the dominance  
333 of naked forms of barley in the highlands of Asia is not clear, but it has been suggested that

334 cultural preference was the main factor for selecting naked over hulled barleys [50]. However,  
335 naked barley is better adopted to highland environments, especially those characterized by  
336 strong continental climates [51,52]. In mountain cultivation areas, naked varieties produce  
337 higher grain yields, generate more overall biomass, and mature faster than hulled varieties [53].  
338

339 The finding of highly compacted barley at Chap II is also particularly interesting as it reveals  
340 what morphotypes were selected by early farmers inhabiting mountainous landscapes and gives  
341 insight on crop adaptation in these highland regions during the third millennium BCE. Future  
342 studies comparing metrical variation of lowland and highland barley grains and chaff could  
343 lead to a better understanding of how barley varieties were advantageous in certain  
344 environmental niches. Knüpfner [52] note that landraces of modern naked barleys collected  
345 from the high-mountain regions of Central Asia are short with thick, lodging straw and have  
346 grains that are more compact and spherical than those of taller barley varieties.

347

348 It has been suggested that plump forms of wheat and six-row naked barley, in particular, are  
349 water-demanding crops that likely required irrigation or high amounts of rainfall for successful  
350 cultivation in western Central Asia and the Near East [54]. The possibility that the inhabitants  
351 of Chap II used irrigation in the Kochkor valley cannot also be ruled out. It is plausible that  
352 irrigation technologies spread together with the first farming communities to the central Tien  
353 Shan and further eastwards to China [55]. The occupation of Chap II during the second half of  
354 the third millennium BCE coincides with the Subboreal climate period of dry and cold  
355 conditions [56,57]. People may have been motivated to seek out high-mountain water sources,  
356 such as perennial springs, when the lowlands were characterized by water shortages due to  
357 glacial melt waters decreasing as precipitation diminished and ice sheets expanded. Moreover,  
358 herding domesticated animals would have also motivated people to seek highland settlements



359 near rich, montane pastures, where they could have integrated pastoralist and plant cultivation  
360 strategies through foddering with agricultural byproducts and dung manuring [16]. One of the  
361 dominant species of wild plants at Chap II is *Carex* sp. (sedges), that normally grow in wetland  
362 environments, which suggests widespread availability of water-saturated soils. Although the  
363 archaeological deposition of sedges at Chap II remains may be the result of animal foddering  
364 or craft production, the finding of sedges among cultivated crops at the Bronze Age Kültepe-  
365 Kanesh archaeological site in Turkey led researchers there to suggest that crops were watered  
366 by irrigation channels [58]. Currently, sedges grow along modern irrigation channels in the  
367 Kochkor valley. At Chap II, the fields were probably located in close proximity to water  
368 sources, either irrigated channels or natural streams that could be easily redirected. Stable  
369 isotopic analysis of the grains recovered at Chap II is needed to examine watering regimes for  
370 local plant cultivation, as has been previously applied elsewhere [59,60].

371

372 Wild plants and ruderal weeds recovered from Chap II are dominated by *Chenopodium* sp.,  
373 which together with *Galium* sp., normally inhabit nitrogen-rich domestic settings modified by  
374 intensive pastoralist herding and corralling [30]. The few faunal skeletal remains were  
375 recovered from Chap II (~25 specimens), likely represent domesticated ruminant species. The  
376 presence of domesticated sheep and goats dated to ~2700 cal BCE were identified by  
377 mitochondrial DNA at Dali located in the Dzhungar Mountains of southeastern Kazakhstan  
378 [16]. It is possible that pastoralist subsistence spread northward through the Tien Shan  
379 mountains along the Inner Asian Mountain Corridor earlier than the occupation of Chap II [61],  
380 although additional excavation of a wider area of Chap II will aid in the recovery of additional  
381 faunal specimens. Judging from the rest of the wild plant and weed taxa, it is difficult to be  
382 certain whether the recovered crops from Chap II were sown in the autumn or spring. Most of  
383 the abundant wild plants, such as *Chenopodium* sp. and *Galium* sp., are attributed to summer

384 annual plants, which hints to spring-sown varieties of wheat and barley. Nonetheless, the  
385 subsistence strategies in effect at Chap II during the second half of the third millennium BCE  
386 likely involved intensive investment in plant cultivation of numerous cultigens with varied  
387 cultivation schedules, in addition to people also engaging in pastoralist herding involving  
388 varied mobility strategies.

389

## 390 **Conclusions**

391 The Chap II site yielded the largest crop assemblage dated to the third millennium BCE  
392 between Pamir, Tien Shan, and Altai mountains, comprising thousands of cultivated cereal  
393 remains with the presence of two species of free-threshing wheat (bread wheat and durum  
394 wheat), glume wheat, and hulled and naked barley. Radiocarbon determinations derived  
395 directly from wheat and barley grains show that Chap II was occupied between 2467-2047 cal  
396 BCE. Analysis of the accompanying weed taxa recovered from Chap II hints at an open  
397 landscape where pastoralist herding likely took place. The dominance of wetland plants in the  
398 assemblage also suggests that cultivated crops may have been irrigated, which would imply  
399 that this technology spread hand in hand the cultivation of southwest Asian crops. Finally, the  
400 chaff and grain remains of glume wheat represents the first time this species was recovered in  
401 the most eastern regions of Central Asia, which critically invigorates a new discussion about  
402 why and where glume wheats became filtered out of crop repertoires as other southwest Asian  
403 crops spread to the eastern parts of Eurasia.

## 404 **Acknowledgements**

405 This research is funded by the European Social Fund according to the activity ‘Improvement  
406 of researchers’ qualification by implementing world-class R&D projects’ of Measure No.

407 09.3.3-LMT-K-712. We would like to acknowledge 14Chrono Centre at Queen's University  
408 Belfast for providing radiocarbon dates at the collaborator's rate.

409

## 410 **References**

- 411 1. Jones M, Hunt H, Lightfoot E, Lister D, Liu X, Motuzaite-Matuzeviciute G. Food  
412 globalization in prehistory. *World Archaeol.* 2011;43: 665–675.
- 413 2. Jones MK. Between Fertile Crescents: minor grain crops and agricultural origins. In:  
414 Jones MK, editor. *Traces of ancestry: studies in honour of Colin Renfrew*. Cambridge:  
415 McDonald Institute for Archaeological Research; 2004. pp. 127–35.
- 416 3. Jones M, Harriet H, Kneale C, Lightfoot E, Lister D, Liu X, et al. Food globalisation in  
417 prehistory: the agrarian foundation of an interconnected continent. *J Br Acad.* 2016.
- 418 4. Liu X, Lister D, Zhao Zh, Petrie CA, Zeng X Jones, PJ, Staff RA, et al. Journey to the east:  
419 wheat and barley took different pathways, and faced different environmental  
420 challenges, on the way to prehistoric China. *Plos1.* 2017;13: 1–16.
- 421 5. Liu X, Jones PJ, Matuzeviciute Matuzeviciute G, Hunt HV, Lister DL, An T, et al. From  
422 ecological opportunism to multi-cropping: Mapping food globalisation in prehistory.  
423 *Quat Sci Rev.* 2019;206: 21–28.
- 424 6. Spengler RN, Frachetti MD, Doumani P, Rouse L, Cerasetti B, Bullion E, et al. Early  
425 agriculture and crop transmission among Bronze Age mobile pastoralists of Central  
426 Asia. *Proc R Soc.* 2014;281: 1–7.
- 427 7. Frachetti MD, Spengler RN, Fritz GJ, Mar'yashev AN. Earliest direct evidence for  
428 broomcorn millet and wheat in the central Eurasian steppe region. *Antiquity.* 2010;84:  
429 993–1010.
- 430 8. Betts A, Jia PW, Dodson J. The origins of wheat in China and potential pathways for its  
431 introduction: A review. *Quat Int.* 2013.
- 432 9. Long T, Leipe C, Jin G, Wagner M, Guo R, Schröder O, et al. The early history of wheat  
433 in China from 14C dating and Bayesian chronological modelling. *Nat Plants.* 2018;4:  
434 272–279.
- 435 10. Wang T, Wei D, Chang X, Yu Z, Zhang X, Wang C, et al. Tianshanbeilu and the Isotopic  
436 Millet Road: Reviewing the late Neolithic/Bronze Age radiation of human millet  
437 consumption from north China to Europe. *Natl Sci Rev.* 2017;6: 1024–1039.
- 438 11. Boivin N, Fuller DQ, Crowther A. Old World globalization and the Columbian exchange:  
439 comparison and contrast. *World Archaeol.* 2012;44: 452–469.

- 440 12. Frachetti, M. Seeds for the soul: ideology and diffusion of domesticated grains across  
441 Inner Asia. Mair, Victor H., Jane Hickman. Reconfiguring the Silk Road: New Research  
442 on East–West Exchange in Antiquity. Mair, Victor H., Jane Hickman. Philadelphia, PA:  
443 University of Pennsylvania Museum of Archaeology and Anthropology; 2014. pp. 41–  
444 54.
- 445 13. Liu X, Lightfoot E, O’Connell TC, Wang H, Li S, Zhou L, et al. From necessity to choice:  
446 dietary revolutions in west China in the second millennium BC. *World Archaeol.*  
447 2014;46: 661–680.
- 448 14. Liu X, Lister DL, Zhao Z, Staff RA, Jones PJ, Zhou L, et al. The virtues of small grain size:  
449 Potential pathways to a distinguishing feature of Asian wheats. *Quat Int.* 2016;426:  
450 107–119.
- 451 15. Motuzaitė Matuzevičiūtė G, Abdykanova A, Kume S, Nishiaki Y, Tabaldiev K. The effect  
452 of geographical margins on cereal grain size variation: Case study for highlands of  
453 Kyrgyzstan. *J Archaeol Sci Rep.* 2018;20: 400–410.
- 454 16. Hermes TR, Frachetti MD, Doumani Dupuy PN, Mar’yashev A, Nebel A, Makarewicz CA.  
455 Early integration of pastoralism and millet cultivation in Bronze Age Eurasia. *Proc R Soc*  
456 *B Biol Sci.* 2019;286: 20191273.
- 457 17. Motuzaitė Matuzevičiūtė G, Preece R, Wang S, Colominas L, Ohnuma K, Kume S, et al.  
458 Ecology and subsistence at the Mesolithic and Bronze Age site of Aigyrzhal-2, Naryn  
459 valley, Kyrgyzstan. *Quat Int.* 2015;437: 35–49.
- 460 18. Spengler RN, Frachetti MD, Doumani PN. Late Bronze Age agriculture at Tasbas in the  
461 Dzhungar Mountains of eastern Kazakhstan. *Quat Int.* 2014;438: 147–157.
- 462 19. Spengler RN, Miller NF, Neef R, Tourtellotte PA, Chang C. Linking agriculture and  
463 exchange to social developments of the Central Asian Iron Age. *J Anthropol Archaeol.*  
464 2017;48: 295–308.
- 465 20. Miller NF. Agricultural development in western Central Asia in the Chalcolithic and  
466 Bronze Ages. *Veg Hist Archaeobotany.* 1999;8: 13–19.
- 467 21. Spengler RN, de Nigris I, Cerasetti B, Carra M, Rouse LM. The breadth of dietary  
468 economy in Bronze Age Central Asia: Case study from Adji Kui 1 in the Murghab region  
469 of Turkmenistan. *J Archaeol Sci Rep.* 2016.
- 470 22. Spengler R N, Willcox G. Archaeobotanical results from Sarazm, Tajikistan, an Early  
471 Bronze Age Settlement on the edge: Agriculture and exchange. *Environ Archaeol.*  
472 2013;18: 211–221.
- 473 23. Doumani PN, Frachetti MD, Beardmore R, Schmaus TM, Spengler RN, Mar’yashev AN.  
474 Burial ritual, agriculture, and craft production among Bronze Age pastoralists at Tasbas  
475 (Kazakhstan). *Archaeol Res Asia.* 2015;1: 17–32.

- 476 24. Motuzaite Matuzeviciute G, Tabaldiev K, Hermes T, Ananyevskaya E, Grikpedis M,  
477 Luneau E, et al. High-Altitude Agro-Pastoralism in the Kyrgyz Tien Shan: New  
478 Excavations of the Chap Farmstead (1065–825 cal b.c.). *J Field Archaeol.* 2020;45: 29–  
479 45. doi:10.1080/00934690.2019.1672128
- 480 25. Campbell G, Moffett L, Straker V. *Environmental Archaeology. A Guide to the Theory  
481 and Practice of Methods, from Sampling and Recovery to Post-excavation* (second  
482 edition). Second edition. Swindon: English Heritage; 2011.
- 483 26. Cappers RTJ, Bekker RM, Jans JEA. *Digitale zadenatlas van Nederland (Digital Seed Atlas  
484 of the Netherlands)*. Groningen: Barkhuis Publishing and Gronigen University Library;  
485 2006.
- 486 27. Jacomet S. *Identification of cereal remains from archaeological sites*. 2nd ed. Basel  
487 University, Basel; 2006.
- 488 28. Reimer PJ, Bard E, Bayliss A, Beck JW, Blackwell PG, Ramsey CB, et al. IntCal13 and  
489 Marine13 radiocarbon age calibration curves 0–50,000 years cal BP. *Radiocarbon.*  
490 2013;55: 1869–1887.
- 491 29. Bronk Ramsey C. Methods for summarizing radiocarbon datasets. *Radiocarbon.*  
492 2017;59: 1809–1833.
- 493 30. Spengler RN. Dung burning in the archaeobotanical record of West Asia: where are we  
494 now? *Veg Hist Archaeobotany.* 2018;28: 215–227.
- 495 31. Vanhanen S. Archaeobotanical study of a late Iron Age agricultural complex at Orijärvi,  
496 Eastern Finland. *Fennosc Archaeol.* 2012;XXIX: 55–72.
- 497 32. Stančikaitė M, Kisielienė D, Mažeika J, Blaževičius P. Environmental conditions and  
498 human interference during the 6th and 13th–15th centuries AD at Vilnius Lower Castle,  
499 east Lithuania. *Veg Hist Archaeobotany.* 2008;17: 239–250.
- 500 33. Clapham A R, Tutin TG, Moore DM. *Flora of the British Isles*. Third. Cambridge:  
501 Cambridge University Press; 1987.
- 502 34. Bordzilovskii EI, Lavrenko EM. *Flora URSS*. Kiev: Academy of science of URSS; 1940.
- 503 35. Motuzaite Matuzeviciute, G., Mir Makhamad, B,. High elevation intense agriculture and  
504 paleolandscape at a prehistoric Chap I site in Kyrgyzstan. *Veg Hist Archaeobotany.*  
505 forthcoming.
- 506 36. Guedes JA d’Alpoim, Lu H, Hein AM, Schmidt AH. Early evidence for the use of wheat  
507 and barley as staple crops on the margins of the Tibetan Plateau. *Proc Natl Acad Sci.*  
508 2015;112: 5625–5630.
- 509 37. Blum A. Constitutive traits affecting plant performance under stress. In: Edmeades GO,  
510 Banziger M, Mickelson HR, Pena-Valdivia CB, editors. *Mexico: International Maize and  
511 Wheat Improvement Center*; 1996. pp. 131–135.

- 512 38. Blum A. Crop responses to drought and the interpretation of adaptation. *Plant Growth*  
513 *Regul.* 1996;20: 135–148.
- 514 39. Blum A. Improving wheat grain filling under stress by stem reserve mobilisation.  
515 *Euphytica.* 1998;100: 77–83.
- 516 40. Nicolas M, Gleadow R, Dalling M. Effects of drought and high temperature on grain  
517 growth in wheat. *Aust J Plant Physiol.* 1984;11: 66.
- 518 41. Shah N, Paulsen G. Interaction of drought and high temperature on photosynthesis and  
519 grain-filling of wheat. *Plant Soil.* 2003;257: 219–226.
- 520 42. Altenbach S, DuPont F, Kothari K, Chan R, Johnson E, Lieu D. Temperature, water and  
521 fertilizer influence the timing of key events during grain development in a US spring  
522 wheat. *J Cereal Sci.* 2003;37: 9–20.
- 523 43. Reed K, Sabljic S, Šoštarić R, Essert S. Grains from ear to ear: the morphology of spelt  
524 and free-threshing wheat from Roman Mursa (Osijek), Croatia. *Veg Hist*  
525 *Archaeobotany.* 2019;28: 623–634. doi:10.1007/s00334-019-00719-4
- 526 44. Stevens CJ, Murphy C, Roberts R, Lucas L, Silva F, Fuller DQ. Between China and South  
527 Asia: A Middle Asian corridor of crop dispersal and agricultural innovation in the  
528 Bronze Age. *The Holocene.* 2016;26: 1541–1555.
- 529 45. Crawford G. East Asian plant domestication. In: Stark ST, editor. *Archaeology of Asia.*  
530 Oxford: Blackwell Publishing; 2006. pp. 77–95.
- 531 46. Flad R, Shuicheng L, Xiaohong W, Zhijun Z. Early wheat in China: Results from new  
532 studies at Donghuishan in the Hexi Corridor. *The Holocene.* 2010;20: 955–965.
- 533 47. Spengler RN. Agriculture in the Central Asian Bronze Age. *J World Prehistory.* 2015;28:  
534 215–253.
- 535 48. Motuzaitė Matuzevičiūtė, G., Telizhenko, S. The First Farmers of Ukraine: an  
536 Archaeobotanical Investigation and AMS Dating of Wheat Grains from the Ratniv-2  
537 Site. *Archeol Litu.* 2016;17: 100–111.
- 538 49. Betts, Alison, Yattoo, Muntaz, Spate, Michael, Frazer, James, Kaloo, Zahoor, Younus,  
539 Rashid, et al. The Northern Neolithic of the Western Himalayas: New Research in the  
540 Kashmir Valley. *Archaeol Res Asia.* 2019;18: 17–39.
- 541 50. Lister DL, Jones MK. Is naked barley an eastern or a western crop? The combined  
542 evidence of archaeobotany and genetics. *Veg Hist Archaeobotany.* 2013;22: 439–446.
- 543 51. Yadav RK, Gautam S, Palikhey E, Joshi BK, Ghimire KH, Gurung R, et al. Agro-  
544 morphological diversity of Nepalese naked barley landraces. *Agric Food Secur.* 2018;7:  
545 86. doi:10.1186/s40066-018-0238-5

- 546 52. Knüpffer H, Terentyeva I, Hammer K, Kovaleva O, Sato K. Ecogeographical diversity—a  
547 Vavilovian approach. In: von Bothmer R, van Hintum T, Knüpffer H, Sato K, editors.  
548 Diversity in barley. Amsterdam: Elsevier; 2003. pp. 53–76.
- 549 53. Ghimire KH, Joshi BK, Gurung R, Palikhey E, Pudasaini N, Parajuli A. Adaptability of  
550 Naked Barley Landraces in Mountain Agro-ecosystem of Nepal. *J Nepal Agric Res*  
551 *Counc.* 2019;5: 34–42. doi:10.3126/jnarc.v5i1.22064
- 552 54. Harlan, J.R. Harlan, JR (1968) Barley: origin, botany, culture, winter hardiness, genetics,  
553 utilization, pests (U.S. Department of Agriculture, Washington, DC). *Agriculture*  
554 *Handbook* no 338. 1968. pp. 9–31.
- 555 55. Li Y, Storozum MJ, Wang X, Guo W. Early irrigation and agropastoralism at  
556 Mohuchahangoukou (MGK), Xinjiang, China. *Archaeol Res Asia.* 2017;12: 23–32.
- 557 56. Park J, Park J, Yi S, Kim JC, Lee E, Choi J. Abrupt Holocene climate shifts in coastal East  
558 Asia, including the 8.2 ka, 4.2 ka, and 2.8 ka BP events, and societal responses on the  
559 Korean peninsula. *Sci Rep.* 2019;9: 1–16. doi:10.1038/s41598-019-47264-8
- 560 57. Wanner H, Beer J, Bütikofer J, Crowley TJ, Cubasch U, Flückiger J, et al. Mid- to Late  
561 Holocene climate change: an overview. *Quat Sci Rev.* 2008;27: 1791–1828.  
562 doi:10.1016/j.quascirev.2008.06.013
- 563 58. Fairbairn A. Preliminary archaeobotanical investigations of plant production,  
564 consumption, and trade at Bronze Age Kültepe-Kanesh. Artici, L., Barjamovic G.,  
565 Fairbairn A., Kulakoglu, F. *Current Research at Kultepe-Kanesh: An Interdisciplinary and*  
566 *Integrative Approach to Trade Networks, Internationalism, and Identity.* Artici, L.,  
567 Barjamovic G., Fairbairn A., Kulakoglu, F. *ISD LLC*; 2014. pp. 177–194.
- 568 59. Styring AK, Charles M, Fantone F, Hald MM, McMahon A, Meadow RH, et al. Isotope  
569 evidence for agricultural extensification reveals how the world’s first cities were fed.  
570 *Nat Plants.* 2017;3: 1–11. doi:10.1038/nplants.2017.76
- 571 60. Vaiglova P, Bogaard A, Collins M, Cavanagh W, Mee C, Renard J, et al. An integrated  
572 stable isotope study of plants and animals from Kouphovouno, southern Greece: a new  
573 look at Neolithic farming. *J Archaeol Sci.* 2014;42: 201–215.  
574 doi:10.1016/j.jas.2013.10.023
- 575 61. Frachetti MD. Multiregional Emergence of Mobile Pastoralism and Nonuniform  
576 Institutional Complexity across Eurasia. *Curr Anthropol.* 2012;53: 2–38.
- 577
- 578
- 579

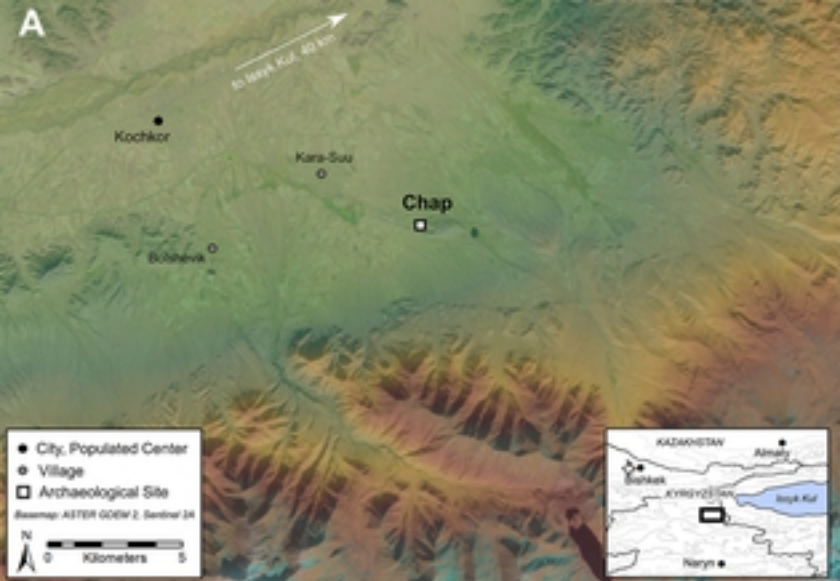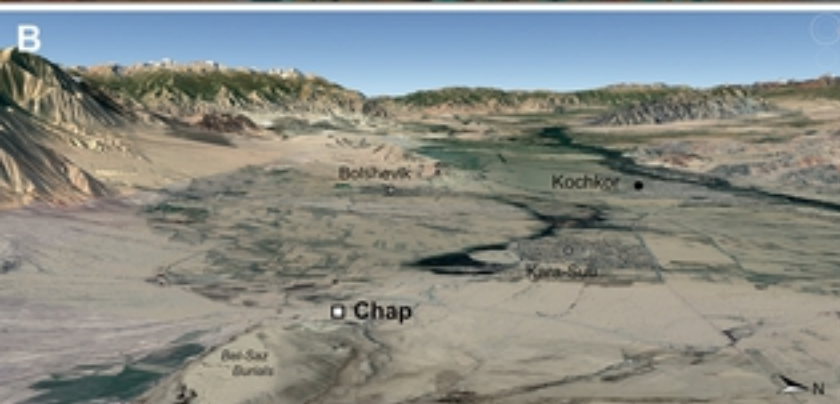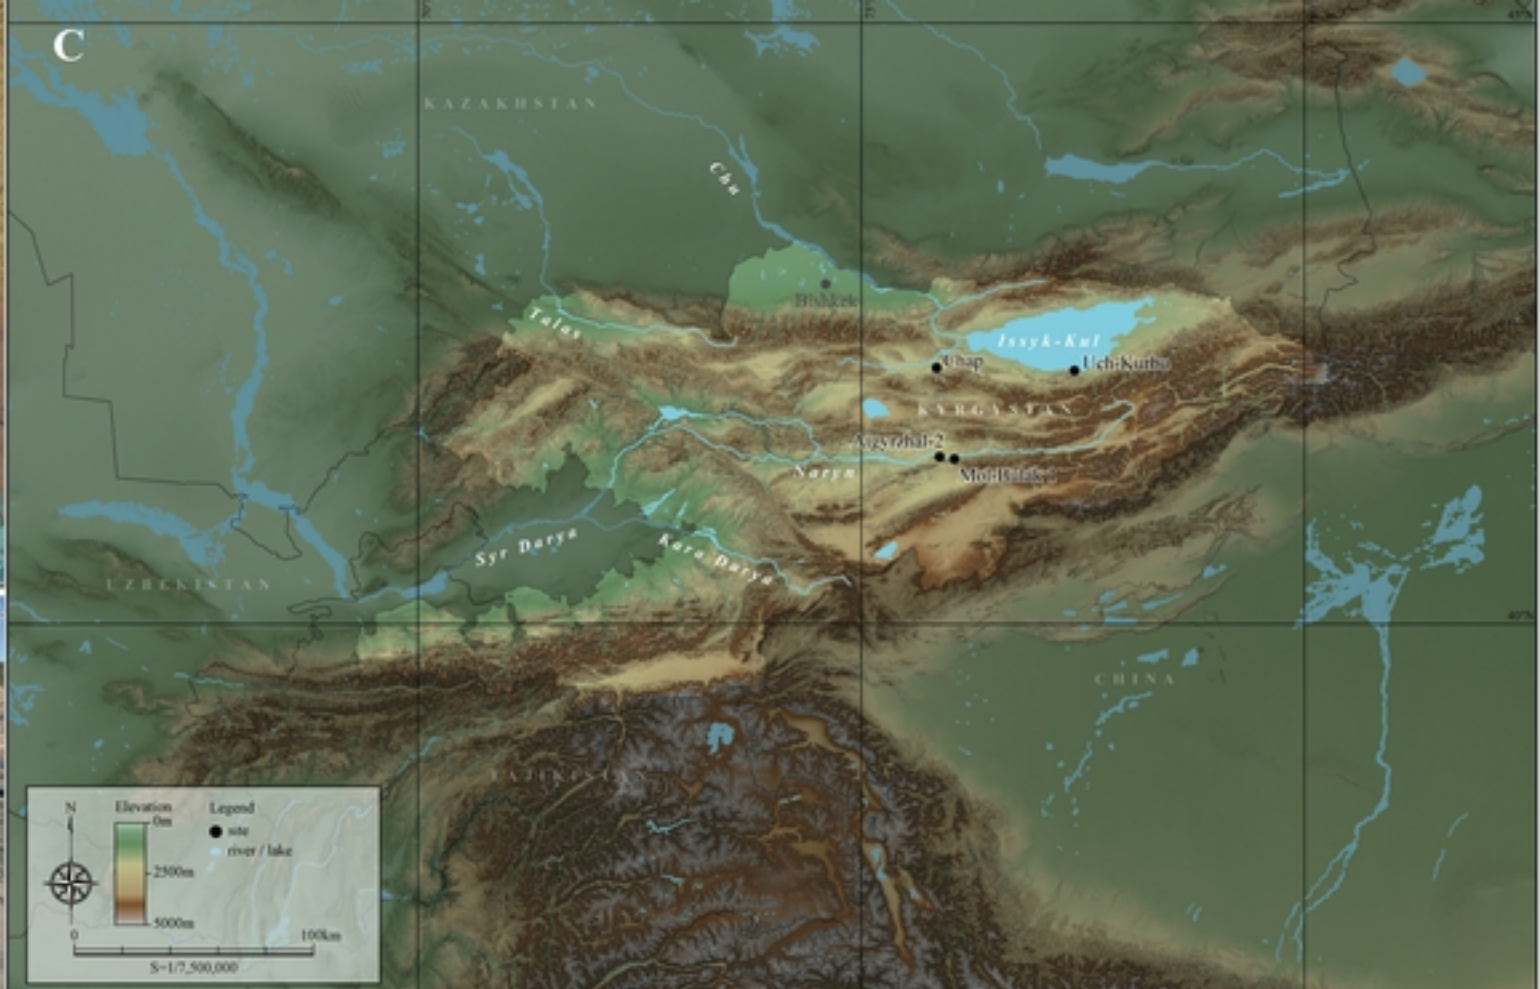

Figure 1



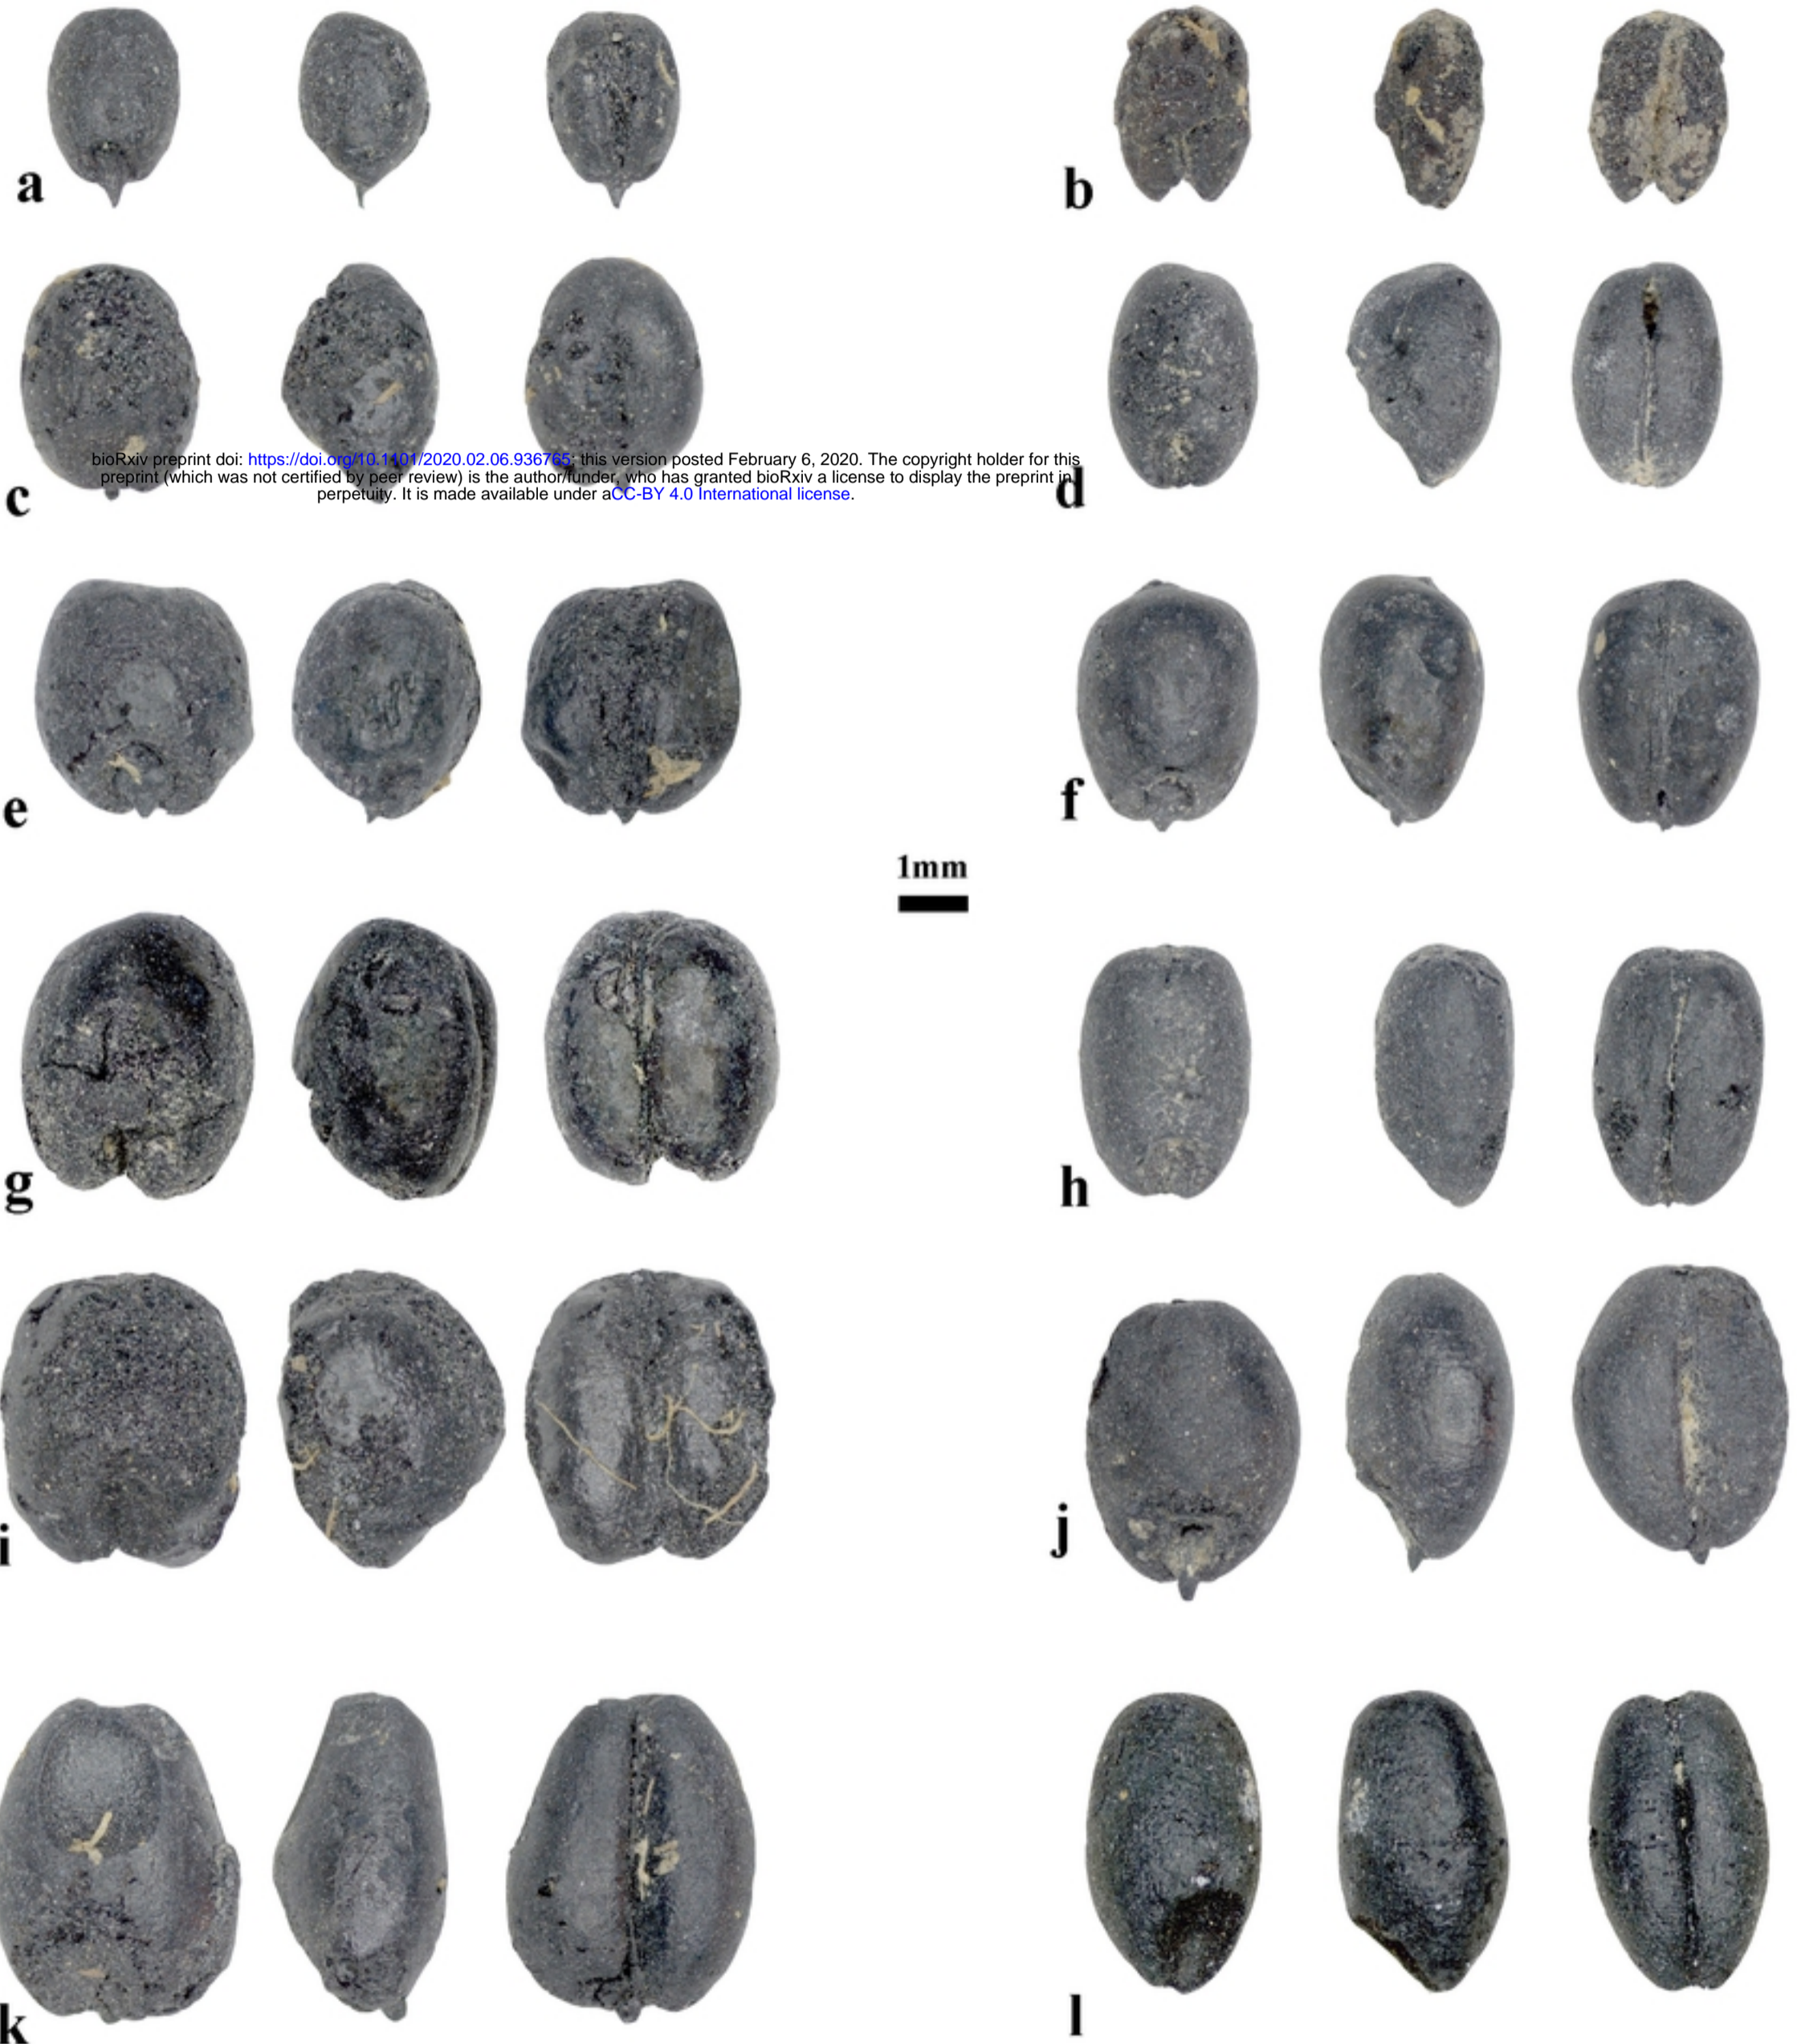

Figure 2

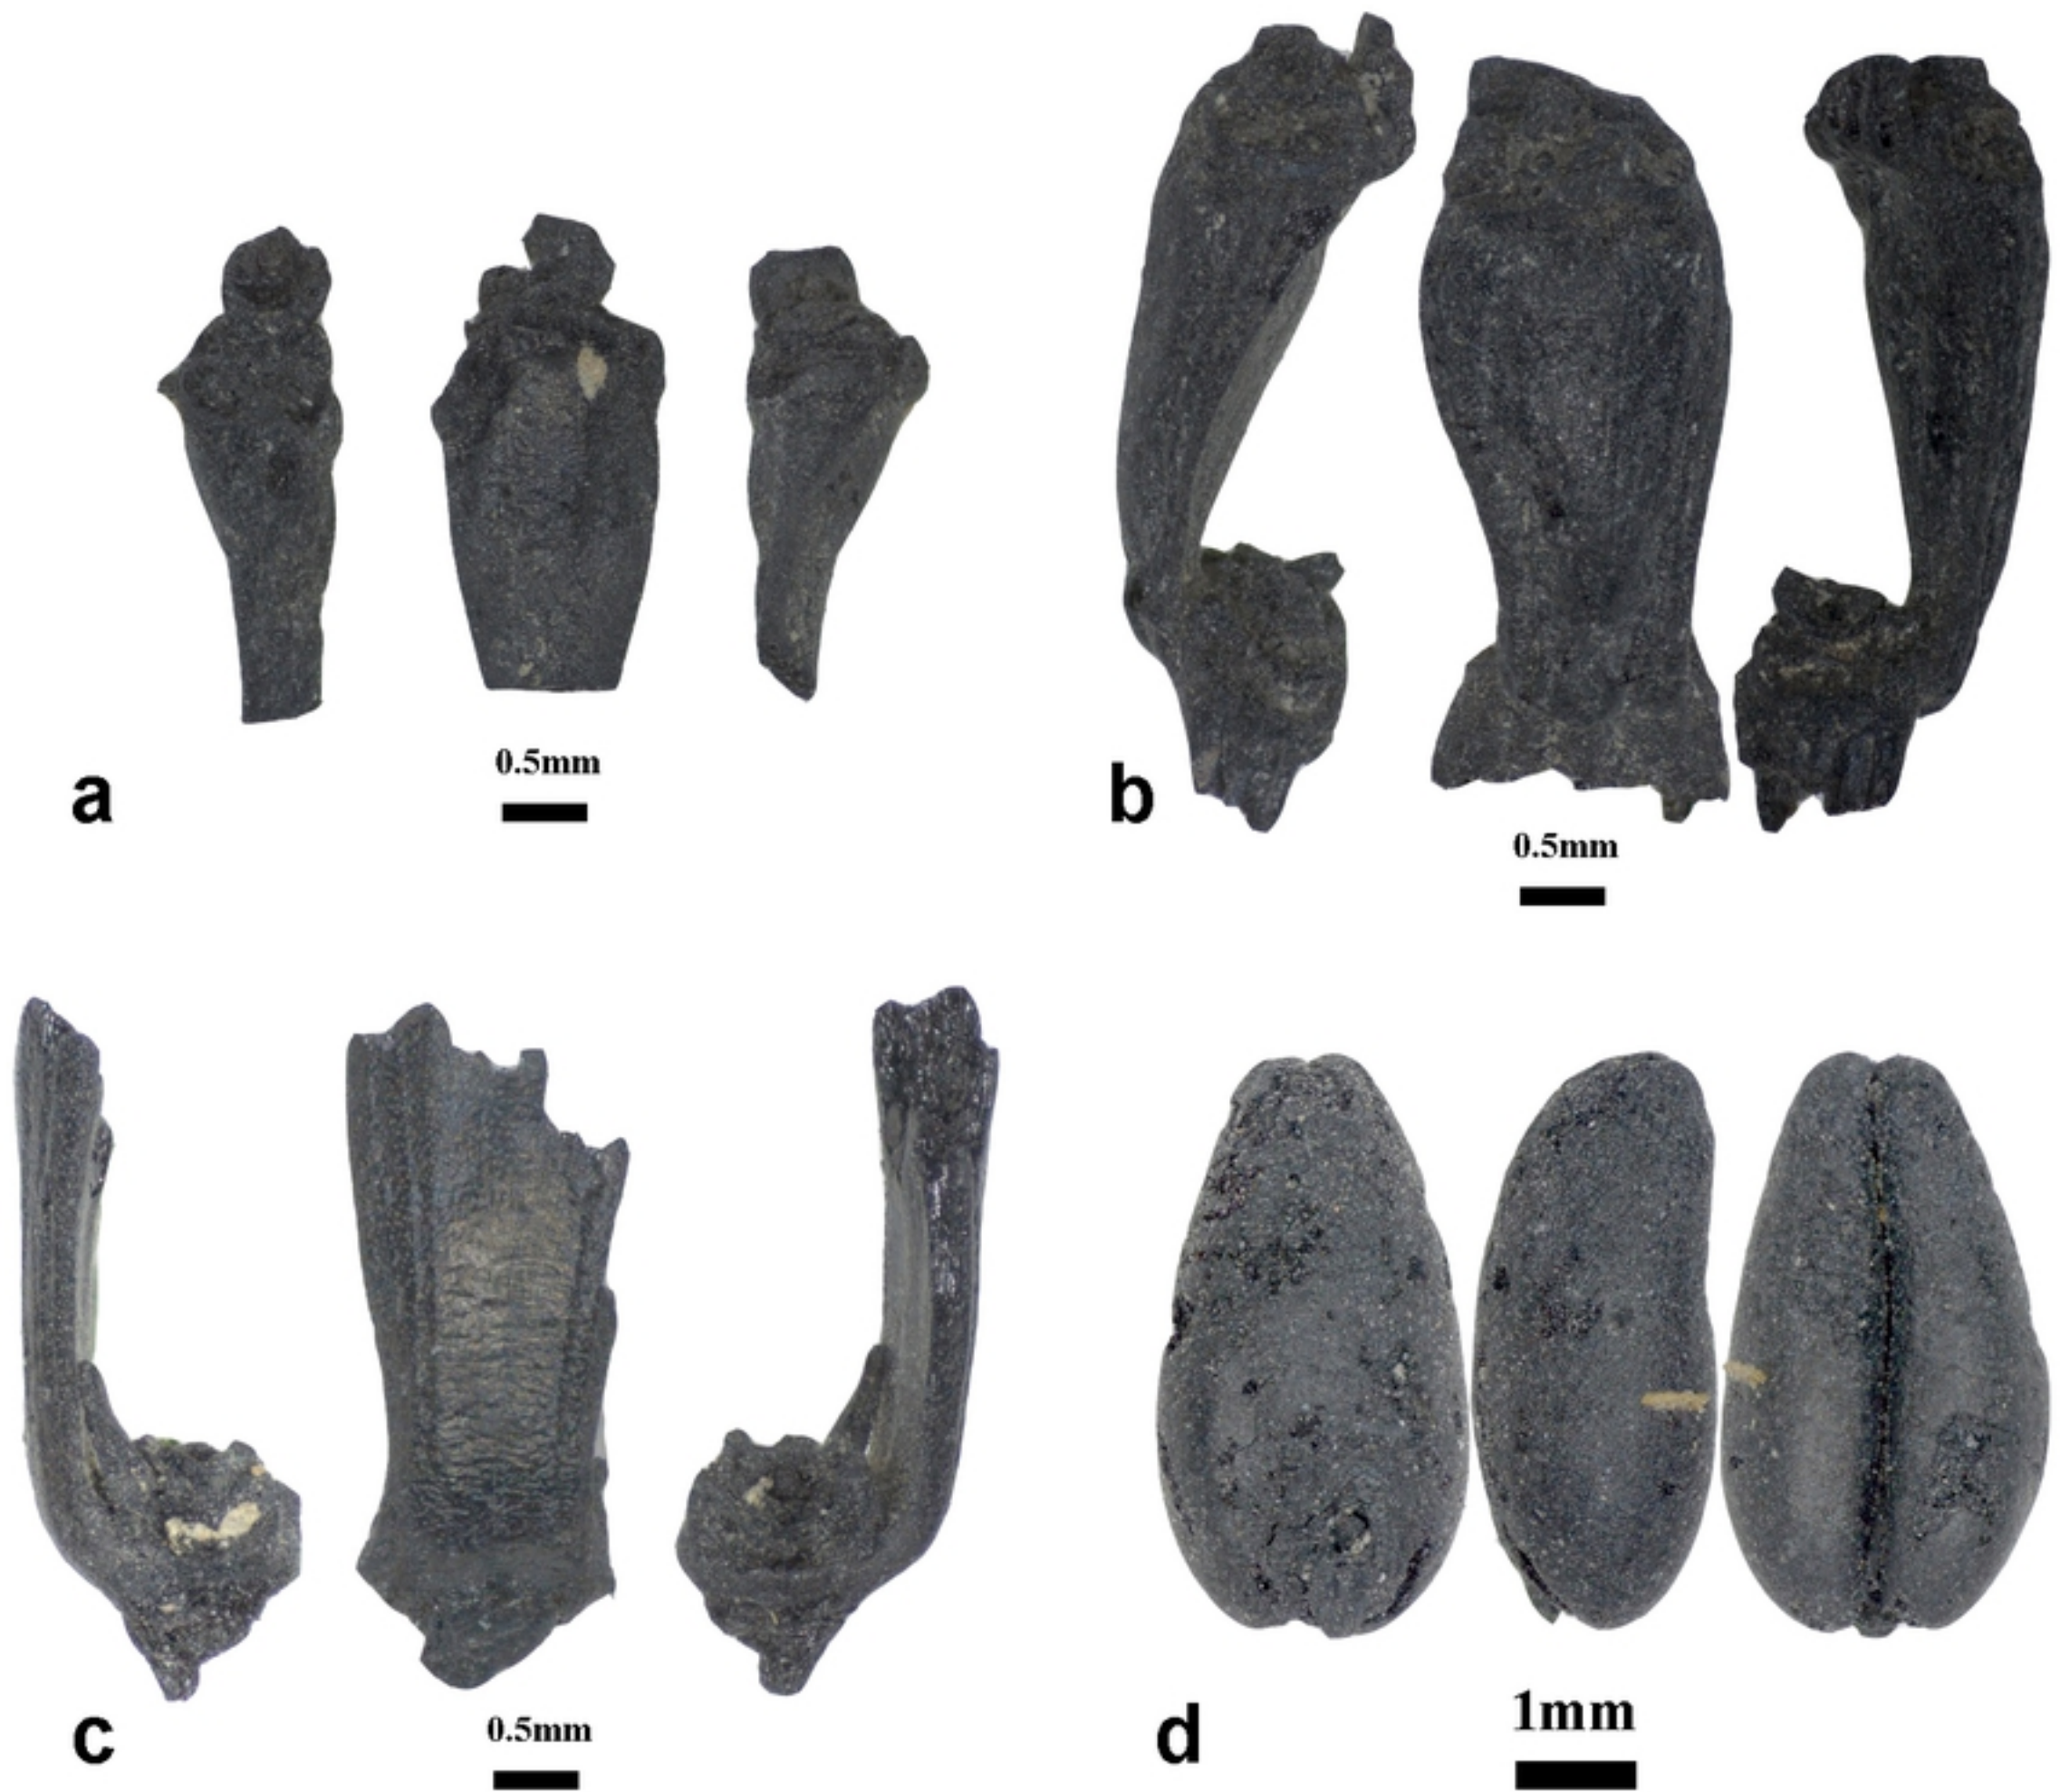

Figure 3

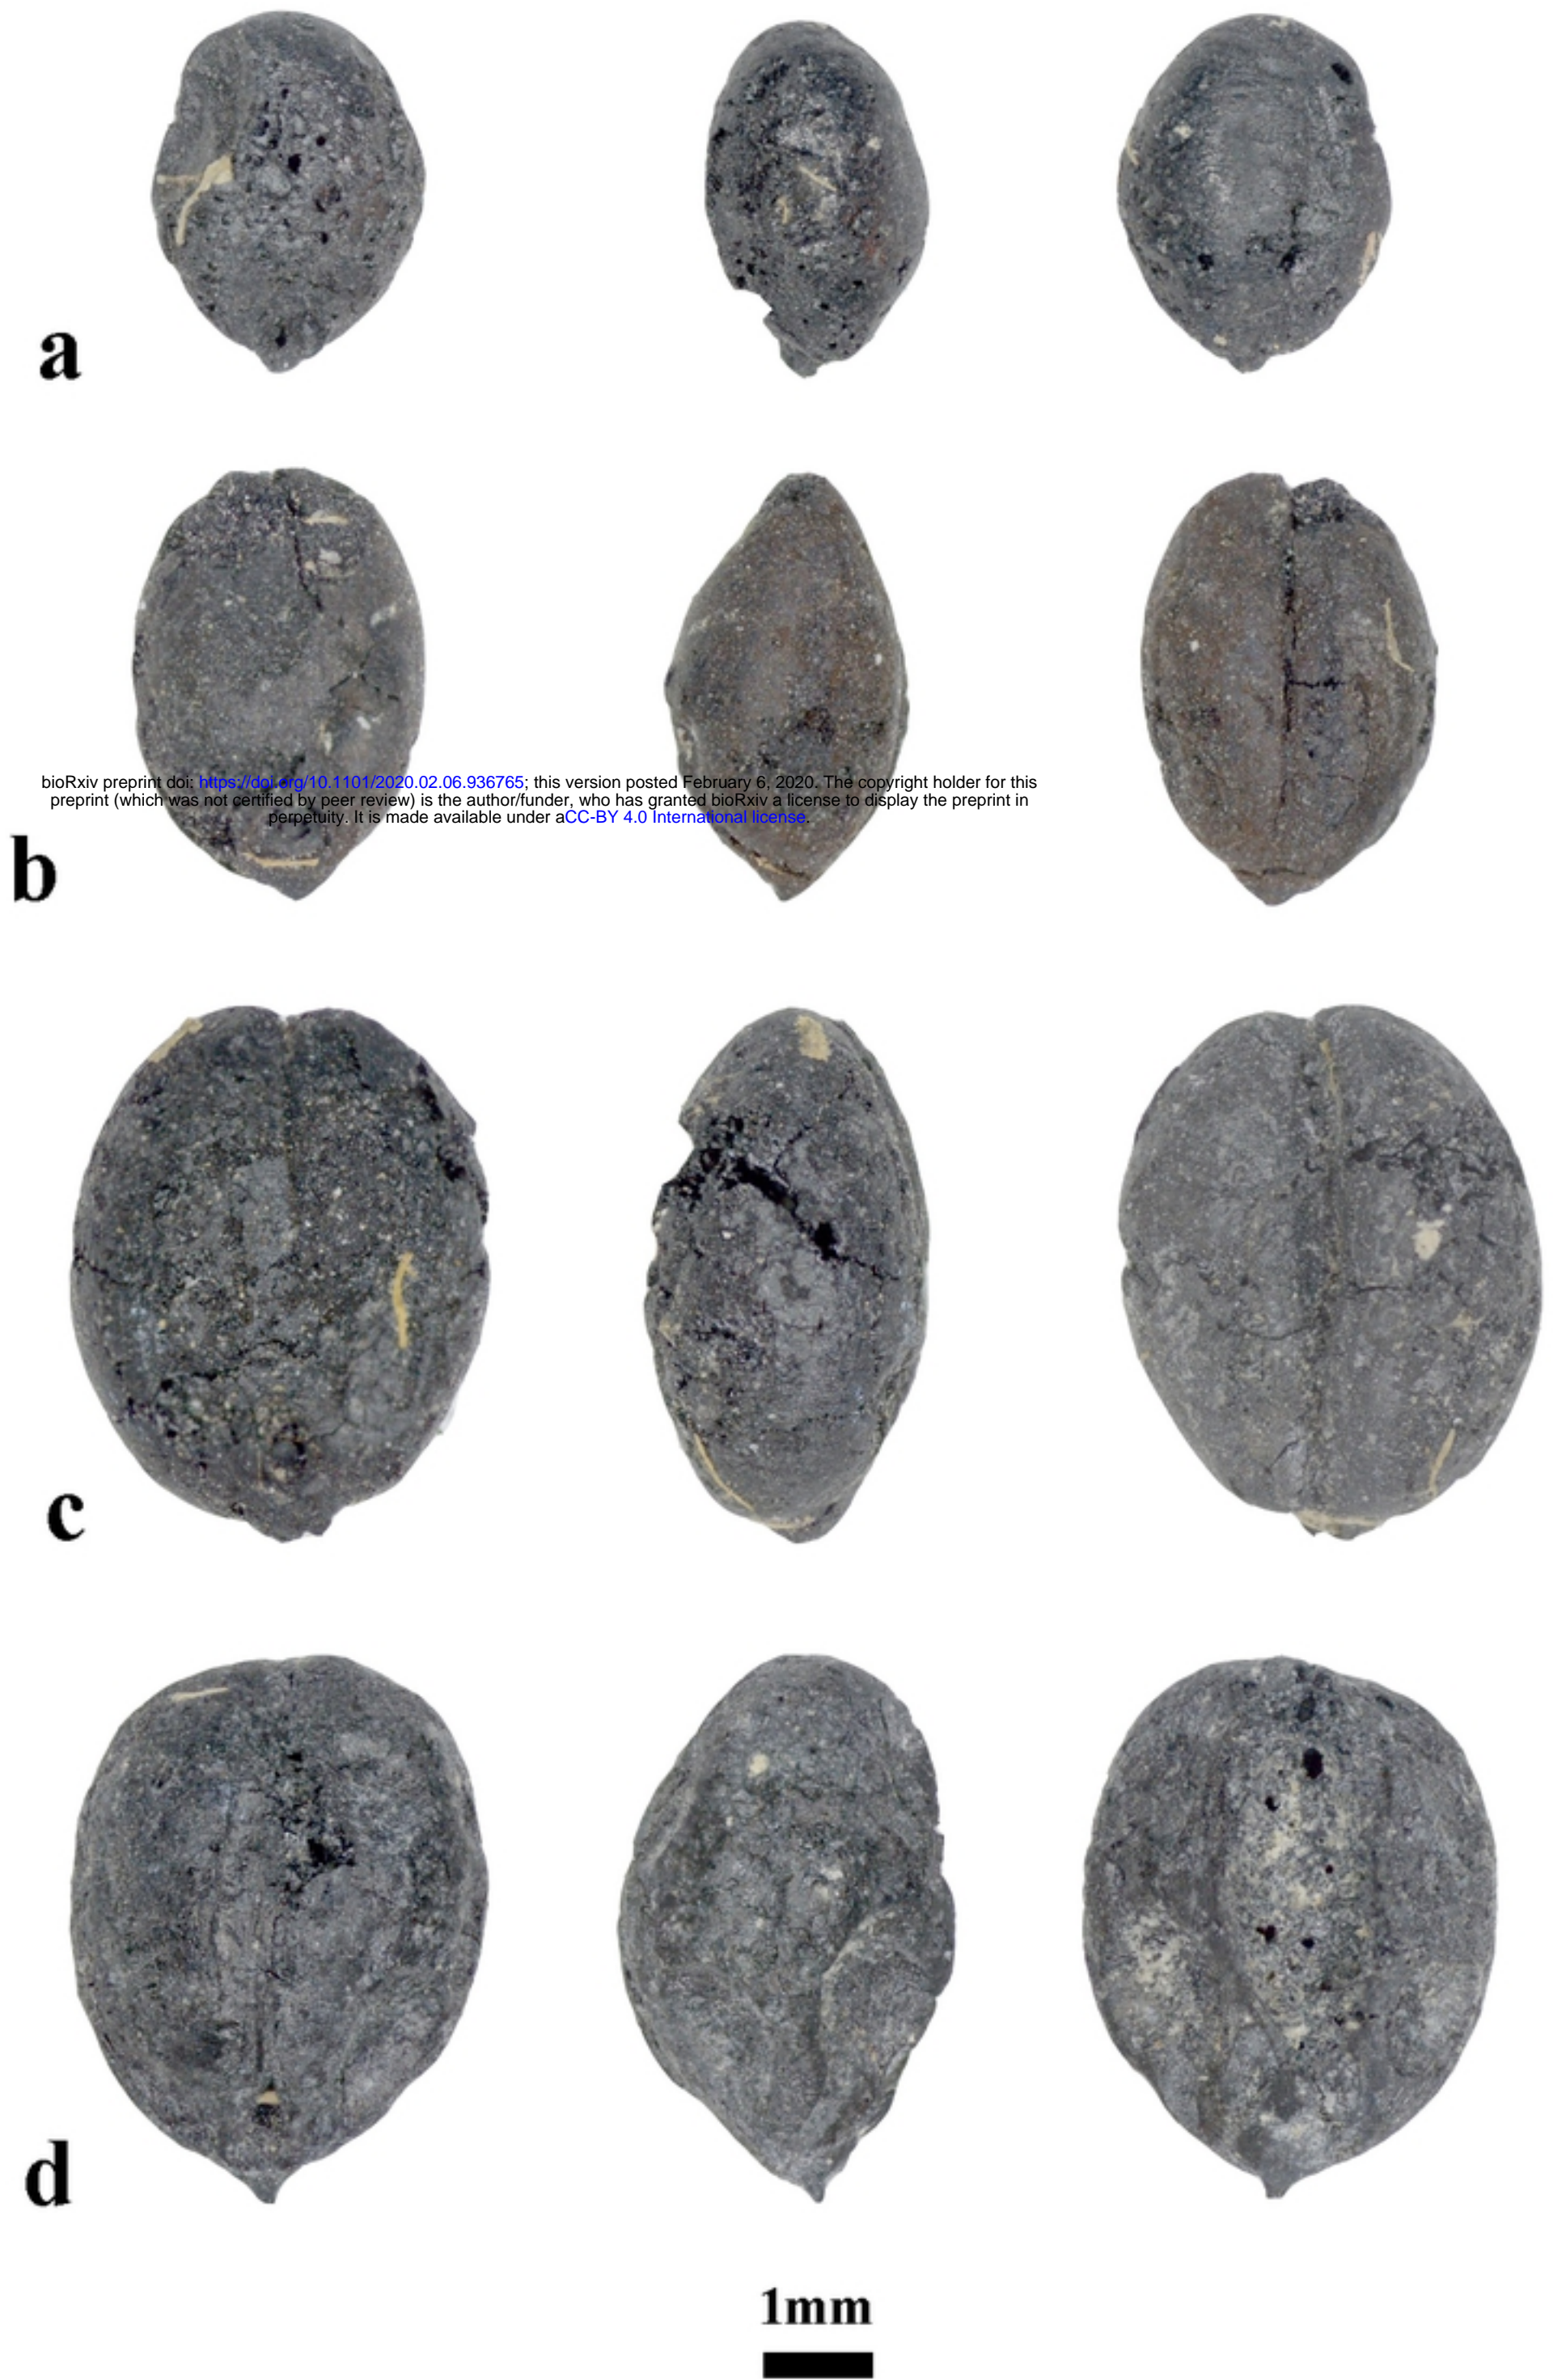

Figure 4

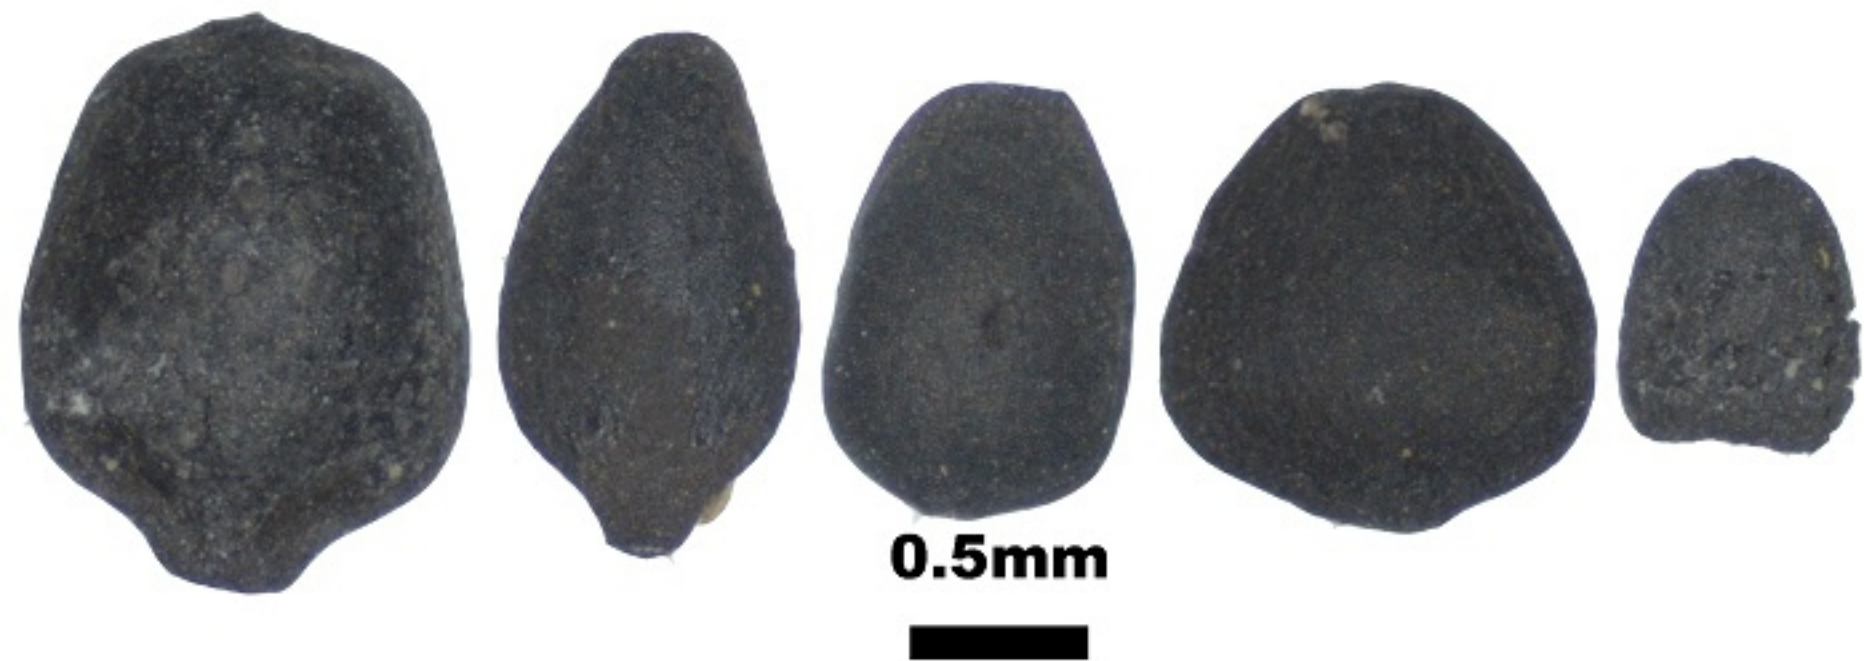

Figure 5

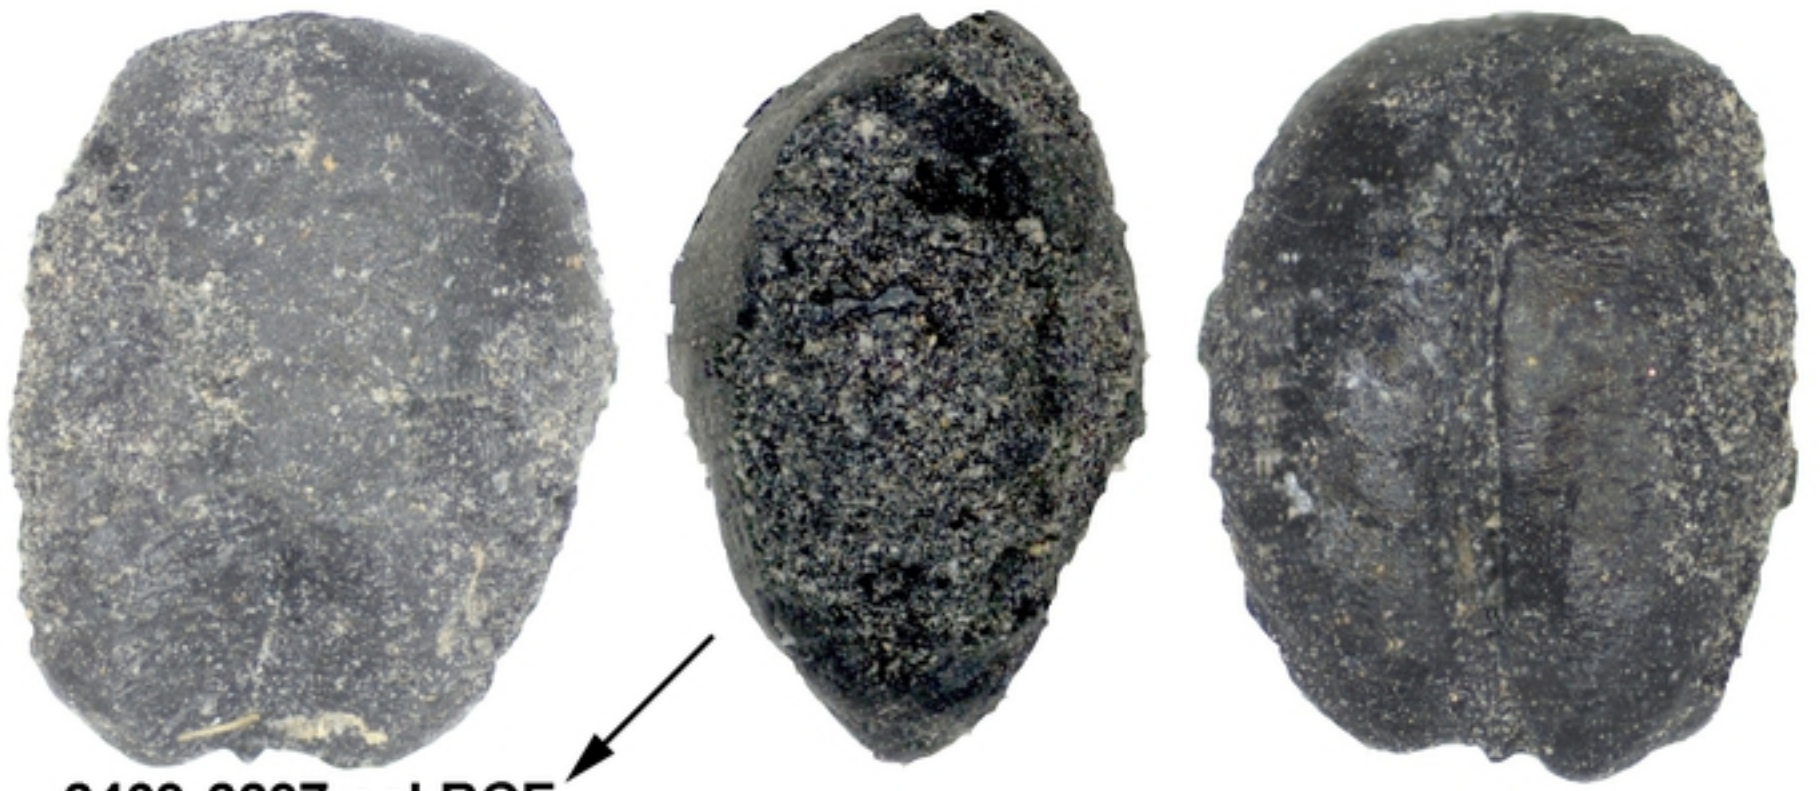

**2469-2297 cal BCE**  
**[UBA-41507]**

0.5mm

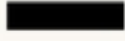

bioRxiv preprint doi: <https://doi.org/10.1101/2020.02.06.936765>; this version posted February 6, 2020. The copyright holder for this preprint (which was not certified by peer review) is the author/funder, who has granted bioRxiv a license to display the preprint in perpetuity. It is made available under aCC-BY 4.0 International license.

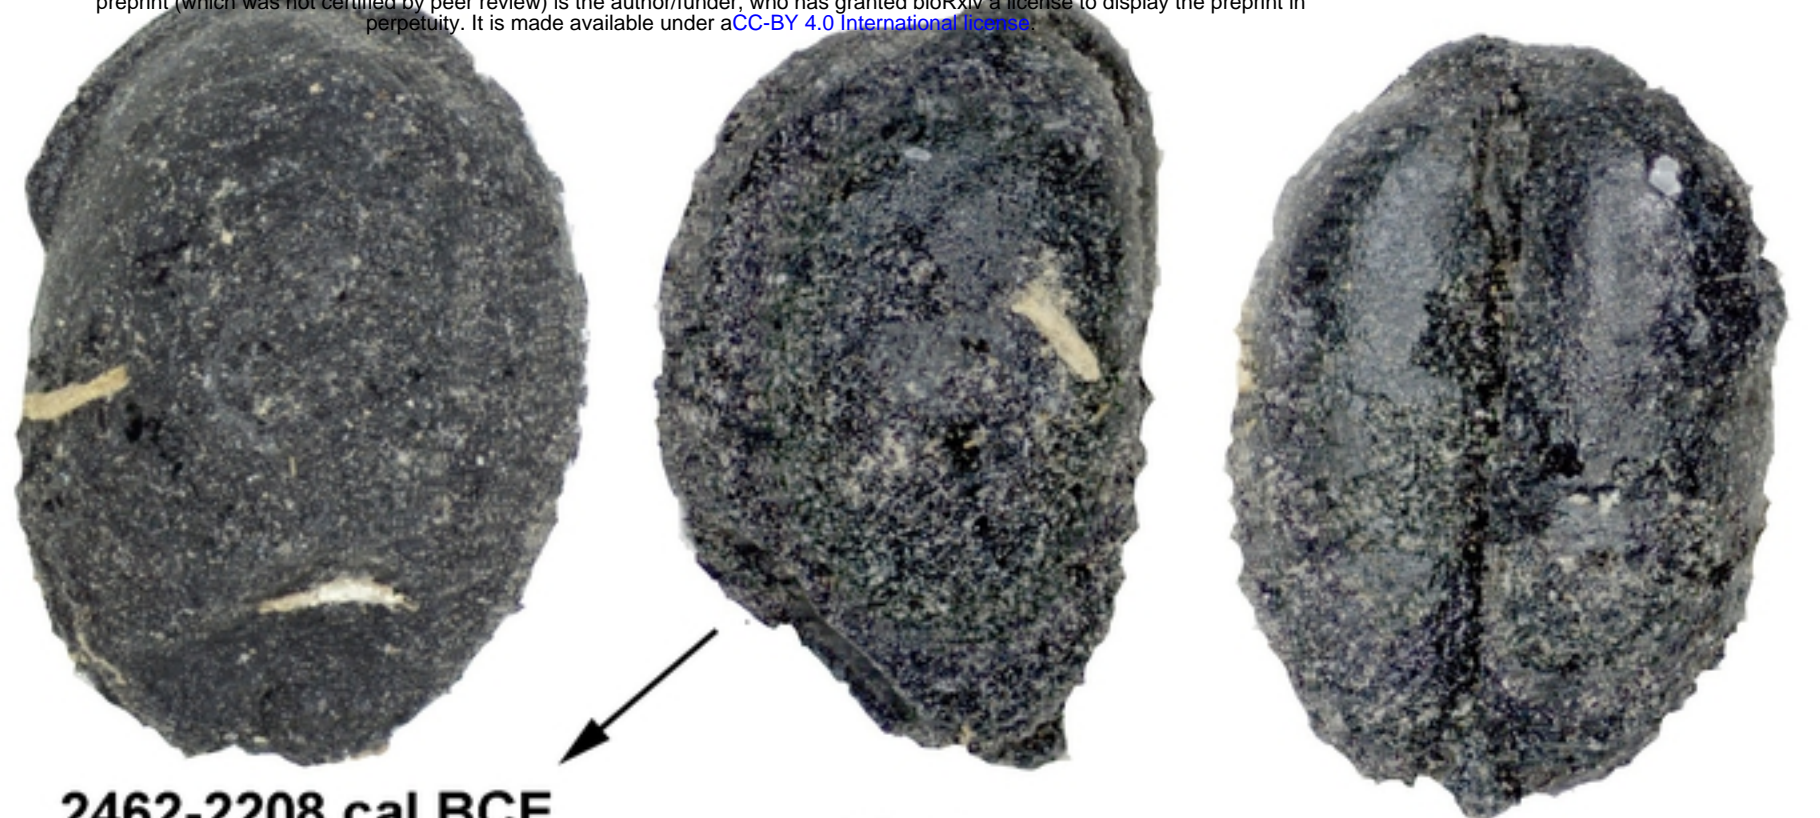

**2462-2208 cal BCE**  
**[UBA-41508]**

0.5mm

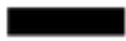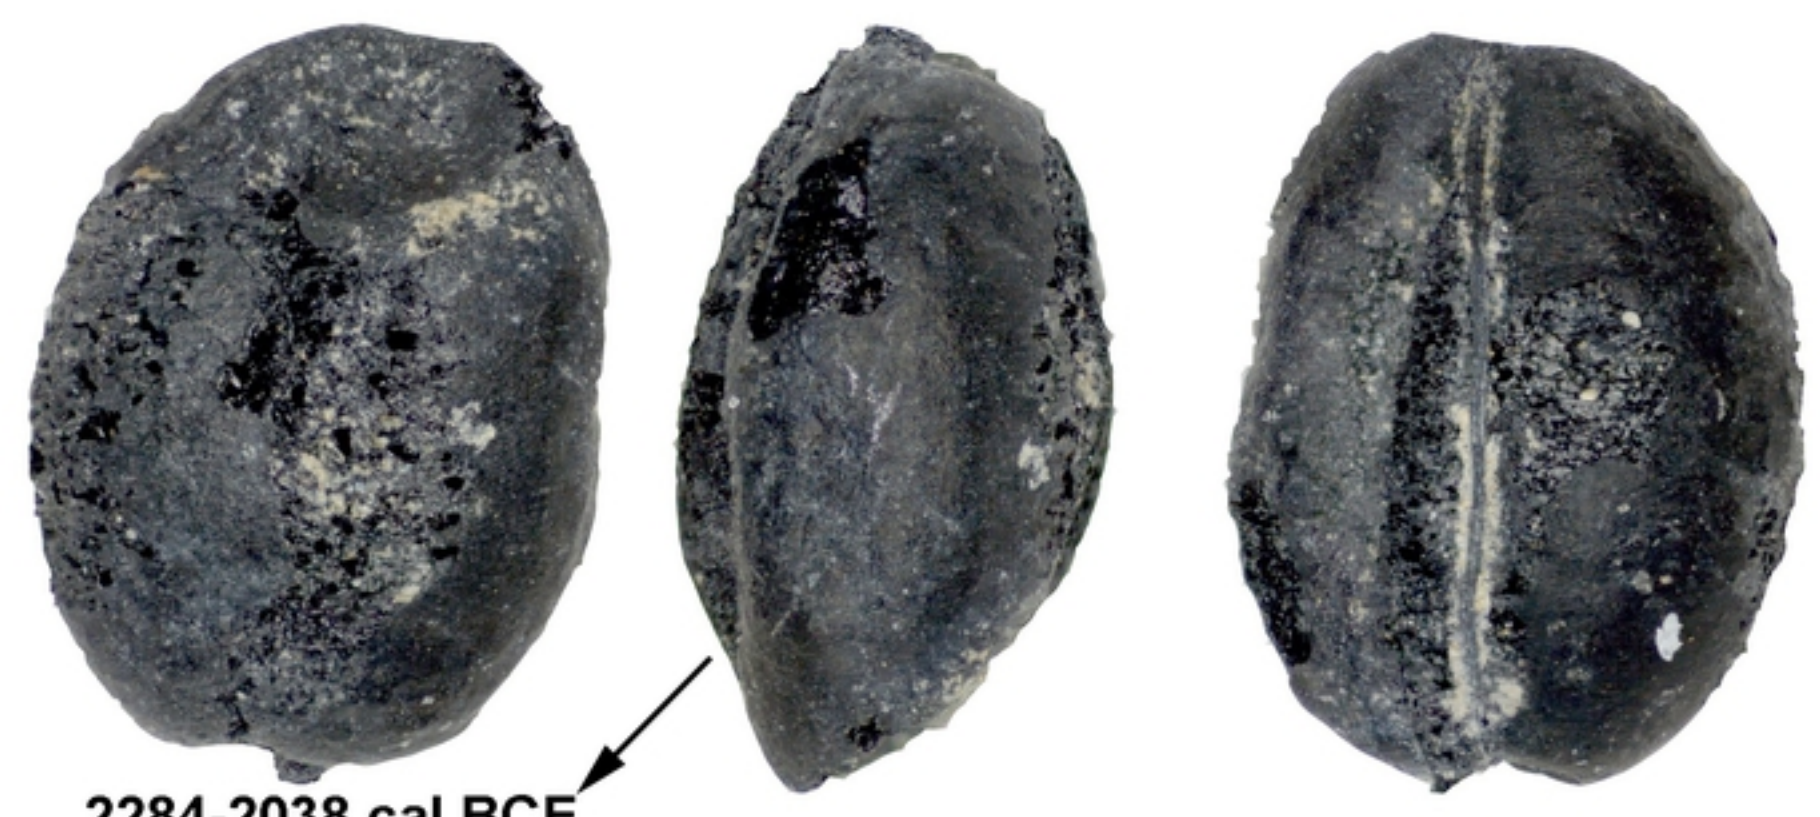

**2284-2038 cal BCE**  
**[UBA-41509]**

0.5mm

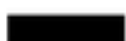

Figure 6

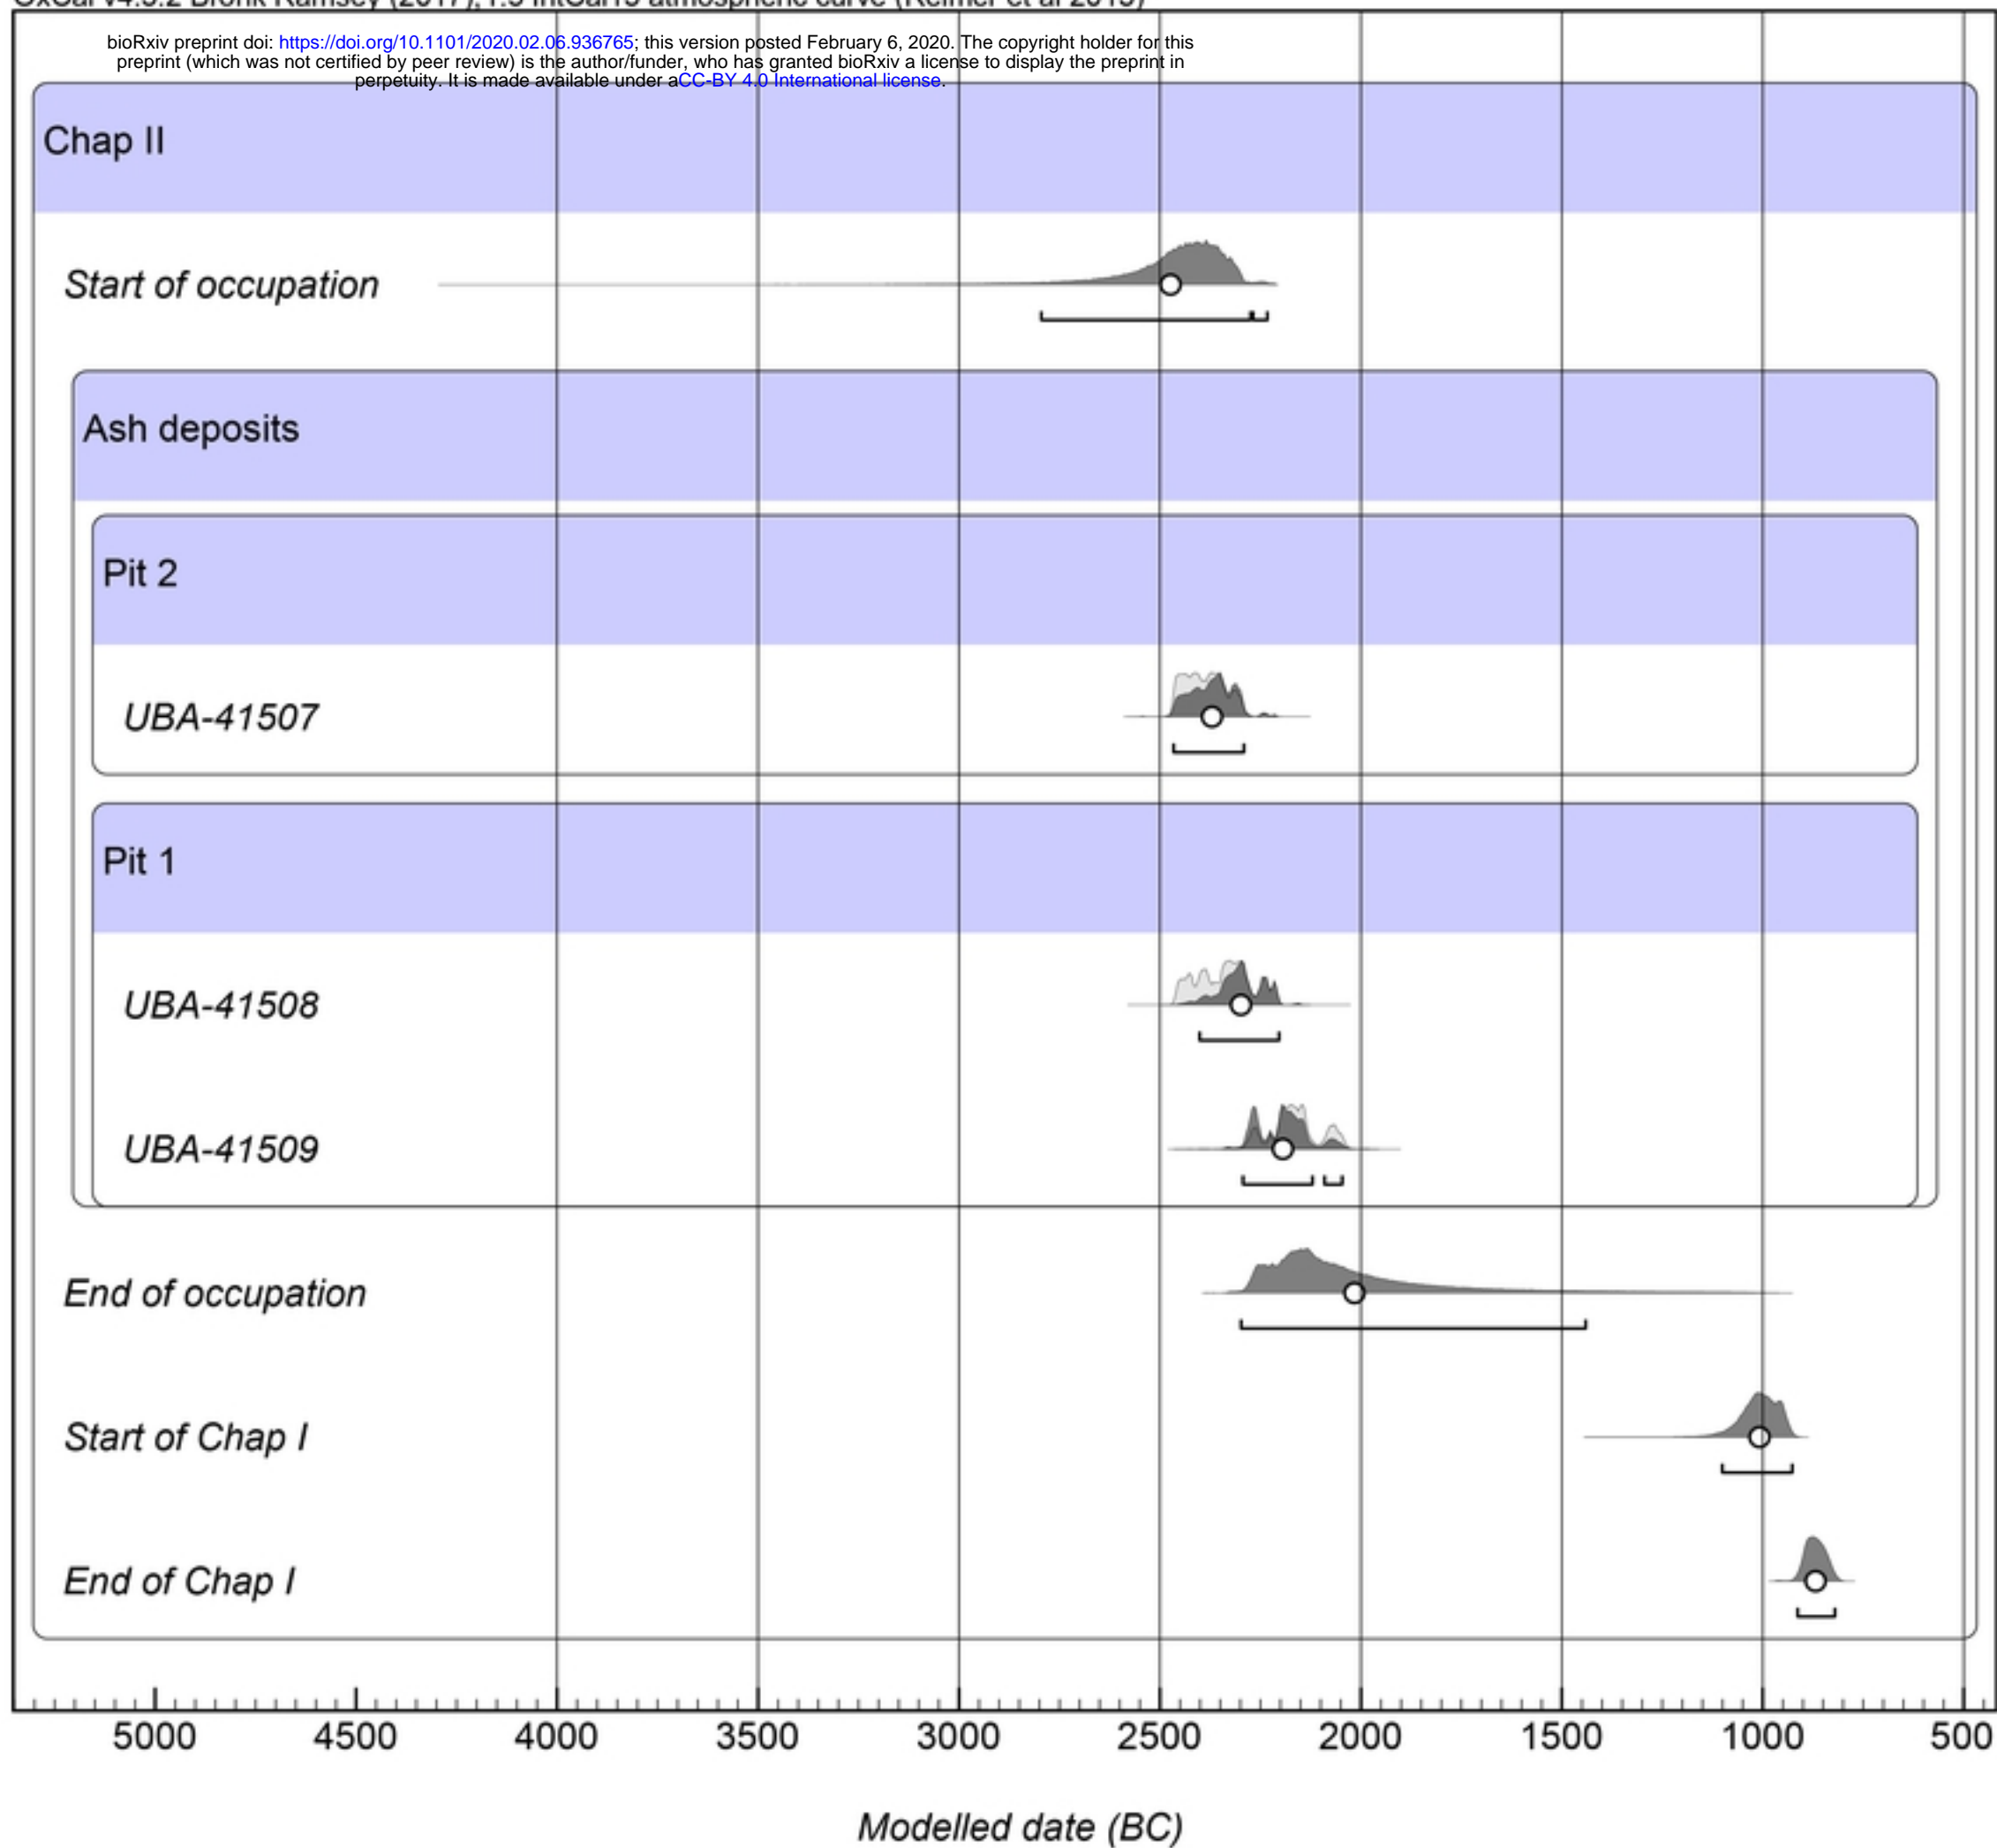

Figure 7
